# Supplementary material for: Computational simulation of anion binding association mechanisms contributing toward rotation of pyrrole rings in dipyrrolyldiketone BF2complexes
Source: Royal Society of Chemistry journal article supplement (doi:10.1039/c9ra09285d), 2020-01-01
Supplement: c9ra09285d1.pdf [file c9ra09285d1.pdf]

## Electronic Supplemental Information for “Computational simulation of the anion binding association mechanism contributed to rotation of pyrrole ring for dipyrrolyldiketone BF<sub>2</sub> complexes”

Osamu Kobayashi,<sup>a</sup> Tomoki Kato,<sup>a</sup> Takako Mashiko,<sup>a</sup> Yohei Haketa,<sup>b</sup> Hiromitsu Maeda<sup>b</sup> and Masanori Tachikawa<sup>\*a</sup>

a. Graduate School of Nanobioscience, Yokohama City University, 22-2 Seto, Kanazawa-ku, Yokohama, Kanagawa 236-0027, Japan, E-mail: tachi@yokohama-cu.ac.jp

b. Department of Applied Chemistry, College of Life Sciences, Ritsumeikan University, 1-1-1 Nojihigashi, Kusatsu, Shiga 525-8577, Japan

### Figures for molecule 1

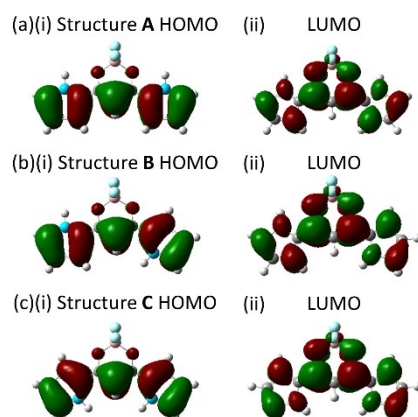

Fig. S1 The MOs of the Structures (a) **A** (b) **B** and (c) **C**. (i) HOMO and (ii) LUMO of corresponding to each structures are shown.

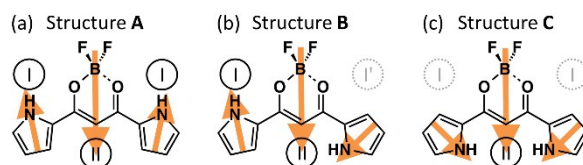

Fig. S2 The schematic representation of the divided dipole moments of **1** (Structures (a) **A**, (b) **B** and (c) **C**). The orange arrows show the divided dipole moments and the black circles are the actual anion-binding sites and the grey circles are disappeared sites.

The structures of the **1-X<sup>-</sup>** shown in Table 2 and Fig. 6.

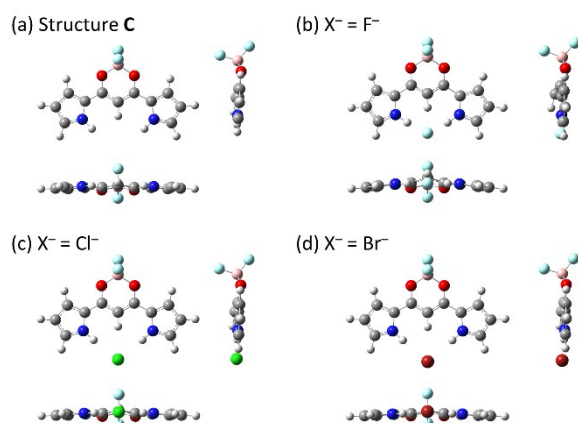

Fig. S3 The structure of C-II capturing (a) no anion, (b) fluoride anion, (c) chloride anion and (d) bromide anion. In (b), the hydrogen atom of backbone is shifted out of the molecular plane because of the strong hydrogen bonding between the hydrogen of pyrrolyl group and  $F^-$ .

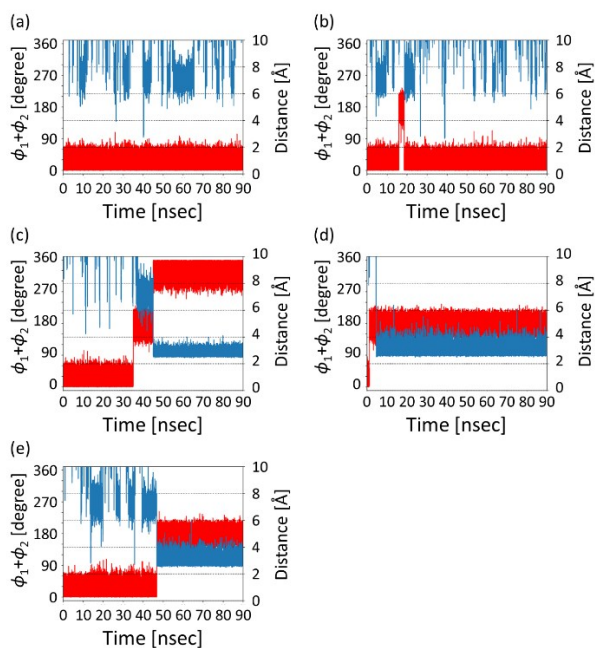

Fig. S4 The distance between CH of 1 and TBA (blue curve) and the sum of the absolute value of two dihedral angles of  $N-C-C=O$  (red curve) along the typical trajectories: (a) no isomerisation, (b) isomerisation to the Structure **B** followed by the reverse rotation, (c) isomerisation to the Structure **C** via the Structure **B-I**, (d) isomerisation to the Structure **B** followed by  $Cl^-$  capturing and (e) isomerisation to the Structure **B-II**. The horizontal, left vertical and the right vertical axes show time, sum of the dihedral angles and the  $CH \cdots Cl^-$  distances. The red curves between  $0^\circ$  and  $120^\circ$ ,  $120^\circ$  and  $240^\circ$ ,  $240^\circ$  and  $360^\circ$  are corresponding to the Structures **A**, **B** and **C**. The blue curve around 4, 7, and over  $10 \text{ \AA}$  are corresponding to the site II, site I, and free  $Cl^-$ , respectively.

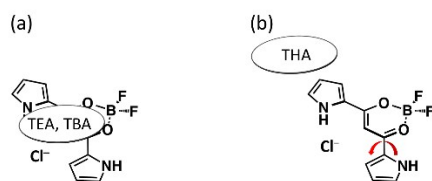

Fig. S5 The schematic structure of the ion pairs of **1** and (a) TEA or TBA and (b) THA. While the TEA and TBA are strongly bound with **1** (as shown in (a)), THA often moves away from **1** (as shown in (b)). This behaviour should lead to the rotation of pyrrole ring from Structure **B-II** to **C-II**.

### The coordinates of the DFT-optimized structures corresponding to Fig. S3

27

Optimized structure of **1**

|   |             |             |             |
|---|-------------|-------------|-------------|
| C | 0.54778800  | -0.03546500 | 2.49654000  |
| C | 2.17190100  | 0.01380900  | 4.02763500  |
| C | 0.97161000  | -0.08853600 | 4.71164200  |
| H | -1.11834200 | -0.19118800 | 3.91679600  |
| H | 2.61943300  | 0.09856200  | 1.98379500  |
| H | 3.18785900  | 0.06310500  | 4.39438300  |
| H | 0.85693200  | -0.13378000 | 5.78590400  |
| C | -0.08404700 | -0.01986900 | 1.20282600  |
| C | 0.60134400  | 0.16077900  | 0.00000000  |
| C | -0.08404700 | -0.01986900 | -1.20282600 |
| O | -1.37354800 | -0.22237800 | -1.21893200 |
| H | 1.66377800  | 0.36071700  | 0.00000000  |
| C | 0.54778800  | -0.03546500 | -2.49654000 |
| C | 2.17190100  | 0.01380900  | -4.02763500 |
| H | 2.61943300  | 0.09856200  | -1.98379500 |
| C | 0.97161000  | -0.08853600 | -4.71164200 |
| H | -1.11834200 | -0.19118800 | -3.91679600 |
| H | 3.18785900  | 0.06310500  | -4.39438300 |
| H | 0.85693200  | -0.13378000 | -5.78590400 |
| B | -2.19035100 | 0.02929400  | 0.00000000  |
| O | -1.37354800 | -0.22237800 | 1.21893200  |
| F | -3.27010800 | -0.83845800 | 0.00000000  |
| F | -2.60034200 | 1.36708300  | 0.00000000  |
| C | -0.05262300 | -0.12044200 | -3.74634700 |
| C | -0.05262300 | -0.12044200 | 3.74634700  |

N 1.91024600 0.04722900 -2.69917800  
N 1.91024600 0.04722900 2.69917800

28

Optimized structure of 1-F<sup>-</sup>

C -0.30437500 0.00999200 -2.39685000  
C -2.16372000 -0.09377500 -3.60265800  
C -1.09879100 -0.20206000 -4.49059900  
H 1.10245900 -0.19065400 -4.07869000  
H -2.26266700 0.06280200 -1.47525500  
H -3.22955100 -0.11469900 -3.78784300  
H -1.17624500 -0.31150100 -5.56425300  
C 0.47405600 0.11865800 -1.19077500  
C -0.13134900 0.49643400 0.00000000  
C 0.47405600 0.11865800 1.19077500  
O 1.73343700 -0.23937800 1.22545800  
H -1.16619700 0.80404800 0.00000000  
C -0.30437500 0.00999200 2.39685000  
C -2.16372000 -0.09377500 3.60265800  
H -2.26266700 0.06280200 1.47525500  
C -1.09879100 -0.20206000 4.49059900  
H 1.10245900 -0.19065400 4.07869000  
H -3.22955100 -0.11469900 3.78784300  
H -1.17624500 -0.31150100 5.56425300  
B 2.55752900 -0.01331700 0.00000000  
O 1.73343700 -0.23937800 -1.22545800  
F 3.60474800 -0.92536700 0.00000000  
F 3.02972200 1.30742000 0.00000000  
C 0.08080500 -0.14381800 3.72425600  
C 0.08080500 -0.14381800 -3.72425600  
N -1.68429800 0.03986800 2.34815300  
N -1.68429800 0.03986800 -2.34815300  
F -3.04689900 0.10638900 0.00000000

28

Optimized structure of 1-Cl<sup>-</sup>

|    |             |             |             |
|----|-------------|-------------|-------------|
| C  | 0.06275600  | -0.04674200 | 2.46575600  |
| C  | 1.77647000  | -0.05399000 | 3.88555500  |
| C  | 0.61874500  | -0.13576100 | 4.64725800  |
| H  | -1.51981400 | -0.18060300 | 3.98463700  |
| H  | 2.11121400  | 0.03152300  | 1.80766200  |
| H  | 2.81505300  | -0.03656400 | 4.18722500  |
| H  | 0.57194500  | -0.19013400 | 5.72656800  |
| C  | -0.61852900 | -0.00019200 | 1.19901200  |
| C  | 0.05368800  | 0.21451200  | 0.00000000  |
| C  | -0.61852900 | -0.00019200 | -1.19901200 |
| O  | -1.90927500 | -0.21621900 | -1.22416700 |
| H  | 1.11730200  | 0.40932900  | 0.00000000  |
| C  | 0.06275600  | -0.04674200 | -2.46575600 |
| C  | 1.77647000  | -0.05399000 | -3.88555500 |
| H  | 2.11121400  | 0.03152300  | -1.80766200 |
| C  | 0.61874500  | -0.13576100 | -4.64725800 |
| H  | -1.51981400 | -0.18060300 | -3.98463700 |
| H  | 2.81505300  | -0.03656400 | -4.18722500 |
| H  | 0.57194500  | -0.19013400 | -5.72656800 |
| B  | -2.71701400 | 0.04258000  | 0.00000000  |
| O  | -1.90927500 | -0.21621900 | 1.22416700  |
| F  | -3.80970900 | -0.81438700 | 0.00000000  |
| F  | -3.12183800 | 1.38535300  | 0.00000000  |
| C  | -0.46491000 | -0.13340200 | -3.74880300 |
| C  | -0.46491000 | -0.13340200 | 3.74880300  |
| N  | 1.43726000  | 0.00242900  | -2.57856200 |
| N  | 1.43726000  | 0.00242900  | 2.57856200  |
| Cl | 3.55912600  | 0.09235900  | 0.00000000  |

28

Optimized structure of 1-Br<sup>-</sup>

|   |             |             |            |
|---|-------------|-------------|------------|
| C | -0.35961800 | -0.08691000 | 2.46934100 |
| C | 1.34227200  | -0.12995300 | 3.90304800 |
| C | 0.17711100  | -0.18967700 | 4.65518200 |
| H | -1.95646400 | -0.19051400 | 3.97566400 |
| H | 1.69643000  | -0.03127900 | 1.83194700 |

|    |             |             |             |
|----|-------------|-------------|-------------|
| H  | 2.37866900  | -0.13143500 | 4.21285100  |
| H  | 0.12038100  | -0.24554400 | 5.73393000  |
| C  | -1.03403700 | -0.02161400 | 1.19958200  |
| C  | -0.35293100 | 0.16061600  | 0.00000000  |
| C  | -1.03403700 | -0.02161400 | -1.19958200 |
| O  | -2.33200600 | -0.18906500 | -1.22425400 |
| H  | 0.71698400  | 0.31491500  | 0.00000000  |
| C  | -0.35961800 | -0.08691000 | -2.46934100 |
| C  | 1.34227200  | -0.12995300 | -3.90304800 |
| H  | 1.69643000  | -0.03127900 | -1.83194700 |
| C  | 0.17711100  | -0.18967700 | -4.65518200 |
| H  | -1.95646400 | -0.19051400 | -3.97566400 |
| H  | 2.37866900  | -0.13143500 | -4.21285100 |
| H  | 0.12038100  | -0.24554400 | -5.73393000 |
| B  | -3.13104200 | 0.09375200  | 0.00000000  |
| O  | -2.33200600 | -0.18906500 | 1.22425400  |
| F  | -4.24918000 | -0.72990800 | 0.00000000  |
| F  | -3.49538600 | 1.44799300  | 0.00000000  |
| C  | -0.89902600 | -0.16376800 | -3.74813200 |
| C  | -0.89902600 | -0.16376800 | 3.74813200  |
| N  | 1.01432700  | -0.06599100 | -2.59378700 |
| N  | 1.01432700  | -0.06599100 | 2.59378700  |
| Br | 3.27628500  | 0.11541100  | 0.00000000  |

**The coordinates of the DFT-optimized structures corresponding to Fig. 4**

27

Optimized structure of 1 (A)

|   |            |             |             |
|---|------------|-------------|-------------|
| C | 2.48503900 | -0.67280200 | -0.01406500 |
| C | 2.85115500 | -2.01165400 | 0.07267600  |
| C | 4.25635200 | -2.06572600 | 0.00471900  |
| C | 4.71061400 | -0.76110800 | -0.12248300 |
| N | 3.63998400 | 0.06461500  | -0.13309300 |
| H | 3.66292800 | 1.07120800  | -0.21300400 |
| H | 2.17442100 | -2.85072300 | 0.16919700  |
| H | 4.87587900 | -2.95129000 | 0.04180900  |

H 5.71573000 -0.37151600 -0.20542300  
C 1.19789300 -0.03111600 0.00000100  
C 0.00000000 -0.72400300 0.15518400  
C -1.19789200 -0.03111700 -0.00000100  
O -1.22112900 1.26566800 -0.17671700  
H 0.00000100 -1.79456500 0.30888100  
C -2.48503800 -0.67280300 -0.01406600  
C -2.85115500 -2.01165400 0.07268400  
N -3.63998200 0.06461400 -0.13310100  
C -4.25635200 -2.06572500 0.00472500  
H -2.17442200 -2.85072200 0.16921300  
C -4.71061300 -0.76110800 -0.12248500  
H -3.66292700 1.07120600 -0.21301900  
H -4.87587900 -2.95128900 0.04182000  
H -5.71572900 -0.37151700 -0.20542900  
B -0.00000100 2.09127800 0.04021300  
O 1.22113000 1.26566900 -0.17671100  
F -0.00000400 2.55813500 1.35793400  
F 0.00000100 3.13524500 -0.87189900

27

Transition state of 1 (A->B)

C 2.54073600 -0.53345400 -0.11473200  
C 4.50504100 -1.47981000 -0.67261700  
C 4.46559300 -1.33284100 0.69478700  
H 2.97499800 -0.52469200 1.96081400  
H 2.97120500 -0.92866700 -2.22604800  
H 5.32038100 -1.90569700 -1.24213200  
H 5.18642300 -1.58833400 1.45853100  
C 1.19665700 0.08659400 -0.06831900  
C 0.05962100 -0.66392300 0.10644600  
C -1.19759600 -0.02741400 -0.00211200  
O -1.27917400 1.25923500 -0.15567000  
H 0.13009400 -1.73580100 0.23105700  
C -2.43492100 -0.73954400 0.00541400  
C -4.64882800 -0.97282300 -0.06399500

H -3.73409200 0.92318700 -0.17830500  
C -4.10791000 -2.24791000 0.05918700  
H -1.98121600 -2.89512700 0.19046500  
H -5.67975000 -0.65353000 -0.13023000  
H -4.66846200 -3.17100300 0.10975400  
B -0.08215600 2.15451500 -0.00111000  
O 1.16638000 1.38377000 -0.23300200  
F -0.07766400 2.64749800 1.30409300  
F -0.17589400 3.16832400 -0.93793600  
C -2.71291200 -2.10269500 0.10246800  
N -3.64015700 -0.07930700 -0.09531700  
C 3.28019500 -0.97113500 -1.18973600  
N 3.26894600 -0.75920900 1.02458500

27

Optimized structure of 1 (B)

C 2.53599800 -0.51923900 -0.03691300  
C 3.76786800 0.11526900 -0.13267000  
C 4.76143100 -0.88210300 -0.10332000  
C 4.11158500 -2.10045700 0.00862600  
N 2.77680700 -1.87480000 0.04962200  
H 2.08052900 -2.60176400 0.11202400  
H 3.90856200 1.18486500 -0.20964900  
H 5.83183900 -0.73834900 -0.15677700  
H 4.50634300 -3.10574700 0.06032400  
C 1.22254600 0.07068500 -0.01488300  
C 0.04594900 -0.65535600 0.16371800  
C -1.17692700 -0.00603200 -0.00256700  
O -1.24367300 1.28512000 -0.19336500  
H 0.06350200 -1.72152400 0.34358800  
C -2.43918100 -0.69475800 -0.01276100  
C -2.75502600 -2.04618700 0.07783800  
N -3.62105700 -0.00149100 -0.13337600  
C -4.15698000 -2.15303400 0.01126600  
H -2.04766400 -2.85956200 0.17484900  
C -4.65974300 -0.86649200 -0.11940600



H -3.68150700 1.00334000 -0.21629000  
H -4.74269100 -3.06116700 0.05127600  
H -5.67898500 -0.51552900 -0.20240100  
B -0.04359400 2.14438800 0.03591600  
O 1.19569400 1.36299500 -0.21129200  
F -0.05370600 2.57591900 1.36615300  
F -0.08779500 3.20950800 -0.84910400

27

Transition state of 1 (B->C)

C 2.50142400 -0.55420400 -0.11161100  
C 4.43715900 -1.55975200 -0.66487200  
C 4.40221700 -1.40495800 0.70175700  
H 2.93784300 -0.54451500 1.96374500  
H 2.92023200 -0.97122100 -2.22115500  
H 5.23988000 -2.01150100 -1.23234500  
H 5.11596100 -1.67641700 1.46664400  
C 1.17692300 0.10737100 -0.06966000  
C 0.01658800 -0.60771900 0.11592600  
C -1.22413100 0.05904500 -0.01119700  
O -1.26250800 1.34464100 -0.17913500  
H 0.07355100 -1.67743600 0.26327100  
C -2.49060100 -0.60509600 -0.01173600  
C -3.97001700 -2.27248800 0.04690700  
H -1.91726900 -2.66584400 0.09099400  
C -4.69337800 -1.08962000 -0.03013600  
H -3.96514200 1.02086000 -0.12529400  
H -4.30789900 -3.29870800 0.09105000  
H -5.77115400 -1.00789500 -0.05428900  
B -0.04717200 2.20306000 -0.00925600  
O 1.18395800 1.40003400 -0.24940400  
F -0.02503500 2.67741500 1.30303700  
F -0.10553600 3.23106400 -0.93270700  
C -3.76272100 -0.04018500 -0.06845700  
N -2.65294900 -1.97579700 0.06027700  
C 3.22754900 -1.01837900 -1.18455100

N 3.22256500 -0.79569000 1.02897700

27

Optimized structure of 1 (C)

C 0.54778800 -0.03546500 2.49654000  
C 2.17190100 0.01380900 4.02763500  
C 0.97161000 -0.08853600 4.71164200  
H -1.11834200 -0.19118800 3.91679600  
H 2.61943300 0.09856200 1.98379500  
H 3.18785900 0.06310500 4.39438300  
H 0.85693200 -0.13378000 5.78590400  
C -0.08404700 -0.01986900 1.20282600  
C 0.60134400 0.16077900 0.00000000  
C -0.08404700 -0.01986900 -1.20282600  
O -1.37354800 -0.22237800 -1.21893200  
H 1.66377800 0.36071700 0.00000000  
C 0.54778800 -0.03546500 -2.49654000  
C 2.17190100 0.01380900 -4.02763500  
H 2.61943300 0.09856200 -1.98379500  
C 0.97161000 -0.08853600 -4.71164200  
H -1.11834200 -0.19118800 -3.91679600  
H 3.18785900 0.06310500 -4.39438300  
H 0.85693200 -0.13378000 -5.78590400  
B -2.19035100 0.02929400 0.00000000  
O -1.37354800 -0.22237800 1.21893200  
F -3.27010800 -0.83845800 0.00000000  
F -2.60034200 1.36708300 0.00000000  
C -0.05262300 -0.12044200 -3.74634700  
C -0.05262300 -0.12044200 3.74634700  
N 1.91024600 0.04722900 -2.69917800  
N 1.91024600 0.04722900 2.69917800

**The coordinates of the DFT-optimized structures corresponding to Fig. 6**

28

Optimized structure of 1-Cl<sup>-</sup> (A-I)

|    |             |             |             |
|----|-------------|-------------|-------------|
| C  | -1.65201200 | 1.40899400  | 0.02373700  |
| C  | -1.66827100 | 2.80415900  | 0.07561400  |
| C  | -3.01296800 | 3.20557900  | 0.03687300  |
| C  | -3.77807000 | 2.04514100  | -0.03815900 |
| N  | -2.95612400 | 0.97899000  | -0.04658100 |
| H  | -3.29294000 | 0.00715000  | -0.09228300 |
| H  | -0.80090500 | 3.44985200  | 0.12940800  |
| H  | -3.39364900 | 4.21782800  | 0.05896800  |
| H  | -4.85077600 | 1.91196600  | -0.08514700 |
| C  | -0.55037500 | 0.49124200  | 0.03561700  |
| C  | 0.78119600  | 0.90828700  | 0.15717700  |
| C  | 1.79140600  | -0.02654500 | -0.00823000 |
| O  | 1.53198000  | -1.30227800 | -0.16310100 |
| H  | 1.01804700  | 1.95474400  | 0.29180900  |
| C  | 3.19184500  | 0.31958500  | -0.05559700 |
| C  | 3.84317200  | 1.54505900  | -0.00443600 |
| N  | 4.15342900  | -0.65596300 | -0.16768900 |
| C  | 5.22685600  | 1.28684200  | -0.08702600 |
| H  | 3.36852800  | 2.51408100  | 0.07950000  |
| C  | 5.38180300  | -0.08679600 | -0.18703000 |
| H  | 3.95070700  | -1.64378200 | -0.22233500 |
| H  | 6.02564100  | 2.01591500  | -0.07661000 |
| H  | 6.27553200  | -0.68961000 | -0.26876700 |
| B  | 0.16772500  | -1.83091400 | 0.12700700  |
| O  | -0.85162300 | -0.77154000 | -0.10698800 |
| F  | 0.11799000  | -2.21821400 | 1.47085900  |
| F  | -0.08289600 | -2.89570600 | -0.72309100 |
| Cl | -4.74153700 | -1.62577700 | -0.18883200 |

28

Transition state of 1-Cl<sup>-</sup> (A-I -> B->II)

|   |            |             |             |
|---|------------|-------------|-------------|
| C | 2.62856000 | -0.59966300 | -0.45718300 |
| C | 2.86882200 | -1.76520500 | -1.18128000 |
| C | 4.23216400 | -2.07209900 | -1.03697700 |
| C | 4.78978400 | -1.08976800 | -0.22803200 |
| N | 3.82165000 | -0.21358100 | 0.11175500  |

|    |             |             |             |
|----|-------------|-------------|-------------|
| H  | 3.93338500  | 0.60060400  | 0.69915700  |
| H  | 2.13387800  | -2.32618100 | -1.74365300 |
| H  | 4.75868300  | -2.91319000 | -1.46642100 |
| H  | 5.80461500  | -0.96330100 | 0.12302500  |
| C  | 1.43363600  | 0.16172400  | -0.25789400 |
| C  | 0.19246800  | -0.18967200 | -0.82605000 |
| C  | -0.93244400 | 0.49737700  | -0.43005700 |
| O  | -0.87351200 | 1.54091500  | 0.35529800  |
| H  | 0.10200600  | -1.05443500 | -1.46875900 |
| C  | -2.28892300 | 0.08468900  | -0.85517500 |
| C  | -2.99842500 | 0.42582900  | -1.98785900 |
| N  | -3.05749200 | -0.74927300 | -0.09289900 |
| C  | -4.25334600 | -0.23819700 | -1.89852900 |
| H  | -2.65265600 | 1.08066500  | -2.77767100 |
| C  | -4.25126700 | -0.95388600 | -0.71955400 |
| H  | -2.75262500 | -1.18680300 | 0.78722600  |
| H  | -5.06137900 | -0.19455700 | -2.61731100 |
| H  | -5.00198300 | -1.59562200 | -0.27900500 |
| B  | 0.42708400  | 2.19392900  | 0.64338000  |
| O  | 1.54260200  | 1.19755400  | 0.51919800  |
| F  | 0.42319700  | 2.68835500  | 1.93497700  |
| F  | 0.64716500  | 3.20471900  | -0.29822800 |
| Cl | -1.89768200 | -2.12876700 | 2.52584400  |

28

Optimized structure of 1-Cl<sup>-</sup> (A-II)

|   |            |             |             |
|---|------------|-------------|-------------|
| C | 2.48152200 | -0.14794500 | -0.04439600 |
| C | 2.83257700 | -1.49247500 | 0.00623900  |
| C | 4.23953800 | -1.55288800 | -0.05293500 |
| C | 4.70658800 | -0.24964100 | -0.13843100 |
| N | 3.64242500 | 0.58643900  | -0.13267900 |
| H | 3.67339400 | 1.59423900  | -0.18339000 |
| H | 2.13634200 | -2.32352400 | 0.07225400  |
| H | 4.85166700 | -2.44452600 | -0.03713800 |
| H | 5.71564500 | 0.13376800  | -0.20281000 |
| C | 1.19545900 | 0.49470000  | -0.01860200 |

C 0.00000100 -0.20798100 0.09662800  
C -1.19545500 0.49470400 -0.01859400  
O -1.22216900 1.80099100 -0.14014400  
H -0.00000100 -1.29024500 0.18821500  
C -2.48152000 -0.14793900 -0.04439800  
C -2.83257900 -1.49246700 0.00621900  
N -3.64241600 0.58644500 -0.13276900  
C -4.23954300 -1.55287300 -0.05290600  
H -2.13635000 -2.32352200 0.07223900  
C -4.70658900 -0.24962300 -0.13837700  
H -3.67337700 1.59424200 -0.18354500  
H -4.85167600 -2.44450600 -0.03707000  
H -5.71564600 0.13379300 -0.20271300  
B 0.00000400 2.61971900 0.07225500  
O 1.22217600 1.80098800 -0.14014300  
F 0.00000400 3.10071100 1.38813400  
F 0.00000700 3.66771700 -0.84228600  
Cl -0.00001400 -3.94374200 0.10222400

28

Optimized structure of 1-X<sup>-</sup>

C 2.44972200 0.34569700 -0.00964300  
C 4.64660800 0.69093900 -0.11893700  
C 4.04063500 1.93697800 -0.00529300  
H 1.87119400 2.47268900 0.14397600  
H 3.83104400 -1.25285700 -0.18999500  
H 5.69202900 0.42526000 -0.19686700  
H 4.55355300 2.88856500 0.02228000  
C 1.24760500 -0.42230500 0.01381200  
C -0.03179400 0.16307400 0.15304400  
C -1.13381400 -0.64337200 0.02971800  
O -1.05155000 -1.94321400 -0.13520100  
H -0.14604800 1.23782000 0.26748300  
C -2.50931800 -0.09455400 0.04685900  
C -4.40227900 0.74369400 -0.79824000  
H -2.75091000 0.25678300 -2.02833500

|    |             |             |             |
|----|-------------|-------------|-------------|
| C  | -4.56646100 | 0.65858800  | 0.56505400  |
| H  | -3.13731200 | -0.07078100 | 2.14506300  |
| H  | -5.06591800 | 1.09953800  | -1.57360800 |
| H  | -5.44917800 | 0.95129500  | 1.11803100  |
| B  | 0.23606000  | -2.65617900 | 0.02435000  |
| O  | 1.38617600  | -1.70746400 | -0.13278700 |
| F  | 0.34423900  | -3.63325700 | -0.95700400 |
| F  | 0.30246700  | -3.21081600 | 1.30538900  |
| C  | -3.36130400 | 0.12604600  | 1.10474800  |
| C  | 2.65395200  | 1.72342300  | 0.06350100  |
| N  | -3.15275500 | 0.27989400  | -1.10343200 |
| N  | 3.68588900  | -0.25582900 | -0.12197500 |
| Cl | -0.41231600 | 3.79629300  | 0.08757400  |

28

Optimized structure of 1-Cl<sup>-</sup> (B-II)

|   |             |             |             |
|---|-------------|-------------|-------------|
| C | 2.44969000  | 0.22695800  | -0.08613200 |
| C | 3.62499000  | 0.96655100  | -0.18707300 |
| C | 4.69381300  | 0.05284200  | -0.19165000 |
| C | 4.13873100  | -1.21740300 | -0.09272400 |
| N | 2.79531800  | -1.10602600 | -0.02982500 |
| H | 2.15588900  | -1.90954100 | 0.03990200  |
| H | 3.67744800  | 2.04556200  | -0.24724900 |
| H | 5.74917200  | 0.28067900  | -0.25844900 |
| H | 4.61269800  | -2.18945800 | -0.06369900 |
| C | 1.09135700  | 0.69511900  | -0.03834000 |
| C | -0.00640200 | -0.15241100 | 0.10858600  |
| C | -1.28316900 | 0.38003800  | -0.02749600 |
| O | -1.48524900 | 1.66814300  | -0.16405400 |
| H | 0.12478400  | -1.22277500 | 0.22383400  |
| C | -2.46520800 | -0.44054400 | -0.06437500 |
| C | -2.61956800 | -1.82166300 | -0.02533000 |
| N | -3.71873300 | 0.11842400  | -0.15595500 |
| C | -4.00273000 | -2.08472600 | -0.09354500 |
| H | -1.81404400 | -2.54598400 | 0.03930700  |
| C | -4.65190100 | -0.86196000 | -0.17384300 |

H -3.89461900 1.11173500 -0.19891300  
H -4.48030600 -3.05515300 -0.08730800  
H -5.70547200 -0.62851400 -0.24181900  
B -0.37383200 2.62546000 0.09872900  
O 0.93621600 1.98930200 -0.17926000  
F -0.42194600 3.00624900 1.44766300  
F -0.52822800 3.72435000 -0.73782000  
Cl 0.88433700 -3.67014200 0.18768600

28

Optimized structure of 1-Cl<sup>-</sup> (C-II)

C 0.06275600 -0.04674200 2.46575600  
C 1.77647000 -0.05399000 3.88555500  
C 0.61874500 -0.13576100 4.64725800  
H -1.51981400 -0.18060300 3.98463700  
H 2.11121400 0.03152300 1.80766200  
H 2.81505300 -0.03656400 4.18722500  
H 0.57194500 -0.19013400 5.72656800  
C -0.61852900 -0.00019200 1.19901200  
C 0.05368800 0.21451200 0.00000000  
C -0.61852900 -0.00019200 -1.19901200  
O -1.90927500 -0.21621900 -1.22416700  
H 1.11730200 0.40932900 0.00000000  
C 0.06275600 -0.04674200 -2.46575600  
C 1.77647000 -0.05399000 -3.88555500  
H 2.11121400 0.03152300 -1.80766200  
C 0.61874500 -0.13576100 -4.64725800  
H -1.51981400 -0.18060300 -3.98463700  
H 2.81505300 -0.03656400 -4.18722500  
H 0.57194500 -0.19013400 -5.72656800  
B -2.71701400 0.04258000 0.00000000  
O -1.90927500 -0.21621900 1.22416700  
F -3.80970900 -0.81438700 0.00000000  
F -3.12183800 1.38535300 0.00000000  
C -0.46491000 -0.13340200 -3.74880300  
C -0.46491000 -0.13340200 3.74880300

|    |            |            |             |
|----|------------|------------|-------------|
| N  | 1.43726000 | 0.00242900 | -2.57856200 |
| N  | 1.43726000 | 0.00242900 | 2.57856200  |
| Cl | 3.55912600 | 0.09235900 | 0.00000000  |

**The coordinates of the partially optimized structures using DFT corresponding to Fig. 7**

28

Rotation of py ring w/ anion = 0.0, Rotation of py ring w/o anion = 0.0

|    |             |             |             |
|----|-------------|-------------|-------------|
| C  | -1.65774200 | 1.40298000  | 0.08246200  |
| C  | -1.68636900 | 2.79765000  | 0.14267400  |
| C  | -3.03395100 | 3.18809800  | 0.09148000  |
| C  | -3.78767000 | 2.02231000  | -0.01093600 |
| N  | -2.95674000 | 0.96330100  | -0.01446800 |
| H  | -3.28442600 | -0.00904800 | -0.10192400 |
| H  | -0.82587600 | 3.45000400  | 0.22152500  |
| H  | -3.42348100 | 4.19677900  | 0.12100500  |
| H  | -4.85762800 | 1.87978600  | -0.08481000 |
| C  | -0.55118100 | 0.49115600  | 0.09841600  |
| C  | 0.78116900  | 0.91659100  | 0.16795700  |
| C  | 1.79036400  | -0.02188000 | 0.01762000  |
| O  | 1.53243800  | -1.30320000 | -0.08109700 |
| H  | 1.01715700  | 1.96910000  | 0.24408000  |
| C  | 3.18767700  | 0.32582700  | -0.08371400 |
| C  | 3.83819600  | 1.55274700  | -0.07278700 |
| N  | 4.14506800  | -0.64902600 | -0.23181700 |
| C  | 5.21731200  | 1.29597900  | -0.21501700 |
| H  | 3.36616600  | 2.52170500  | 0.02536300  |
| C  | 5.37017400  | -0.07814100 | -0.31157700 |
| H  | 3.94179000  | -1.63751000 | -0.26983300 |
| H  | 6.01440000  | 2.02633300  | -0.24566800 |
| H  | 6.26039600  | -0.68009400 | -0.42979600 |
| B  | 0.17495100  | -1.82959800 | 0.24151200  |
| O  | -0.85225000 | -0.77689200 | 0.01556100  |
| F  | 0.15175700  | -2.20131900 | 1.59058500  |
| F  | -0.08984900 | -2.90641400 | -0.58969500 |
| Cl | -4.71812300 | -1.61874000 | -0.40510100 |



28

Rotation of py ring w/ anion = 0.0, Rotation of py ring w/o anion = 30.0

|    |             |             |             |
|----|-------------|-------------|-------------|
| C  | -1.64377400 | 1.39605500  | 0.09145300  |
| C  | -1.65241900 | 2.78942300  | 0.19765100  |
| C  | -2.99373400 | 3.19911900  | 0.18393800  |
| C  | -3.76579300 | 2.04624400  | 0.06185000  |
| N  | -2.95134300 | 0.97734800  | 0.00589000  |
| H  | -3.29709700 | 0.01093300  | -0.08212300 |
| H  | -0.78108100 | 3.42727600  | 0.27545400  |
| H  | -3.36876000 | 4.21130500  | 0.25259500  |
| H  | -4.83921900 | 1.92060000  | 0.00985000  |
| C  | -0.54857000 | 0.47627400  | 0.04081400  |
| C  | 0.79362300  | 0.88668600  | 0.11235000  |
| C  | 1.78632600  | -0.04641900 | -0.12276200 |
| O  | 1.52252900  | -1.32552400 | -0.24741500 |
| H  | 1.04557600  | 1.92770600  | 0.26094100  |
| C  | 3.19214800  | 0.29700800  | -0.18734200 |
| C  | 3.82923100  | 1.49606600  | -0.46670000 |
| N  | 4.15540600  | -0.60971400 | 0.18428300  |
| C  | 5.21353500  | 1.28785800  | -0.27703000 |
| H  | 3.34475500  | 2.40829200  | -0.79068500 |
| C  | 5.37782300  | -0.02433900 | 0.13125800  |
| H  | 3.96484000  | -1.56784200 | 0.43982000  |
| H  | 6.00528100  | 2.01045200  | -0.42180000 |
| H  | 6.27162900  | -0.57562100 | 0.38816500  |
| B  | 0.17255100  | -1.84599600 | 0.10833900  |
| O  | -0.85560300 | -0.78451600 | -0.09118400 |
| F  | 0.17825100  | -2.21621500 | 1.45836900  |
| F  | -0.12215600 | -2.91877400 | -0.71630800 |
| Cl | -4.76516200 | -1.57912800 | -0.28045600 |

28

Rotation of py ring w/ anion = 0.0, Rotation of py ring w/o anion = 60.0

|   |             |            |            |
|---|-------------|------------|------------|
| C | -1.60949400 | 1.39354400 | 0.11363500 |
| C | -1.57566600 | 2.78727900 | 0.23502000 |
| C | -2.90235700 | 3.23371400 | 0.26581800 |

|    |             |             |             |
|----|-------------|-------------|-------------|
| C  | -3.71072300 | 2.10330200  | 0.14876100  |
| N  | -2.93168300 | 1.01303600  | 0.05839700  |
| H  | -3.30847700 | 0.05880000  | -0.04860900 |
| H  | -0.68454800 | 3.39863300  | 0.29889700  |
| H  | -3.24671100 | 4.25483300  | 0.35751600  |
| H  | -4.78847800 | 2.01083100  | 0.12090900  |
| C  | -0.54382000 | 0.44933700  | 0.03441000  |
| C  | 0.81850600  | 0.83012500  | 0.07763700  |
| C  | 1.77707200  | -0.11675000 | -0.19571500 |
| O  | 1.48834700  | -1.39223300 | -0.31425100 |
| H  | 1.10044800  | 1.86382400  | 0.22242500  |
| C  | 3.20429900  | 0.20795800  | -0.25676500 |
| C  | 3.86904900  | 1.21787600  | -0.92352600 |
| N  | 4.10108800  | -0.39816100 | 0.58829400  |
| C  | 5.22096500  | 1.18493200  | -0.49399800 |
| H  | 3.42645500  | 1.88834800  | -1.64910600 |
| C  | 5.32610300  | 0.17991900  | 0.44537800  |
| H  | 3.88637900  | -1.17337400 | 1.19801700  |
| H  | 6.02572200  | 1.82388500  | -0.83230500 |
| H  | 6.17317100  | -0.16561900 | 1.02132700  |
| B  | 0.14270000  | -1.88599200 | 0.07970800  |
| O  | -0.87438200 | -0.80171200 | -0.09375200 |
| F  | 0.17386500  | -2.24609000 | 1.43199100  |
| F  | -0.20087300 | -2.95381600 | -0.73010400 |
| Cl | -4.78797400 | -1.48888400 | -0.31596000 |

28

Rotation of py ring w/ anion = 0.0, Rotation of py ring w/o anion = 90.0

|   |             |            |             |
|---|-------------|------------|-------------|
| C | -1.60214300 | 1.40170700 | 0.07934000  |
| C | -1.55321300 | 2.79933100 | 0.15655000  |
| C | -2.87328900 | 3.26192800 | 0.14448400  |
| C | -3.69384000 | 2.13699900 | 0.04938600  |
| N | -2.92830000 | 1.03559100 | 0.01057900  |
| H | -3.31601600 | 0.08255100 | -0.07078200 |
| H | -0.65618100 | 3.40200400 | 0.21906300  |
| H | -3.20667200 | 4.28944700 | 0.19522100  |

|    |             |             |             |
|----|-------------|-------------|-------------|
| H  | -4.77205200 | 2.05696300  | 0.00413500  |
| C  | -0.54792900 | 0.44587200  | 0.05477100  |
| C  | 0.82182900  | 0.81960300  | 0.09641300  |
| C  | 1.77634800  | -0.14474500 | -0.08838700 |
| O  | 1.48354200  | -1.41811000 | -0.19768100 |
| H  | 1.10831900  | 1.85905300  | 0.17747600  |
| C  | 3.21659100  | 0.18952700  | -0.18529600 |
| C  | 3.98753200  | 0.51211000  | -1.27876400 |
| N  | 4.01696000  | 0.23300100  | 0.92692800  |
| C  | 5.30808000  | 0.75107300  | -0.80266700 |
| H  | 3.63654000  | 0.56821300  | -2.30102200 |
| C  | 5.29074500  | 0.57063700  | 0.56125900  |
| H  | 3.71605100  | 0.03243600  | 1.86880900  |
| H  | 6.17013000  | 1.02589100  | -1.39600800 |
| H  | 6.07490800  | 0.65384300  | 1.30048800  |
| B  | 0.12016900  | -1.90427300 | 0.13953200  |
| O  | -0.88373000 | -0.80387200 | -0.03616100 |
| F  | 0.10206300  | -2.29680100 | 1.48128400  |
| F  | -0.21236000 | -2.94577900 | -0.70823000 |
| Cl | -4.79803400 | -1.46084400 | -0.29805100 |

28

Rotation of py ring w/ anion = 0.0, Rotation of py ring w/o anion = 120.0

|   |             |             |             |
|---|-------------|-------------|-------------|
| C | -1.60402900 | 1.40930300  | 0.01522900  |
| C | -1.56417200 | 2.80762000  | 0.01466200  |
| C | -2.88822800 | 3.26084700  | -0.04163400 |
| C | -3.70035900 | 2.12829400  | -0.08080300 |
| N | -2.92604800 | 1.03085300  | -0.04700100 |
| H | -3.30552700 | 0.07231500  | -0.08033300 |
| H | -0.67181300 | 3.41920200  | 0.05444800  |
| H | -3.22773700 | 4.28761800  | -0.05496000 |
| H | -4.77734500 | 2.03854200  | -0.13310300 |
| C | -0.54220500 | 0.45630400  | 0.06009900  |
| C | 0.81818400  | 0.83665500  | 0.07957700  |
| C | 1.78605200  | -0.13856200 | -0.00563100 |
| O | 1.49345800  | -1.41170400 | -0.07177400 |

|    |             |             |             |
|----|-------------|-------------|-------------|
| H  | 1.09618500  | 1.88186400  | 0.06568400  |
| C  | 3.20922800  | 0.18742600  | -0.16711300 |
| C  | 4.11662600  | -0.25179800 | -1.10892000 |
| N  | 3.89174300  | 0.93731100  | 0.75888500  |
| C  | 5.38079200  | 0.28766600  | -0.75408200 |
| H  | 3.88248200  | -0.87659500 | -1.96078000 |
| C  | 5.20838200  | 1.00721000  | 0.40922000  |
| H  | 3.48629500  | 1.35157500  | 1.58489900  |
| H  | 6.31318500  | 0.15995500  | -1.28773400 |
| H  | 5.91481300  | 1.55552300  | 1.01645200  |
| B  | 0.11964000  | -1.89452000 | 0.23494200  |
| O  | -0.88004800 | -0.79813200 | 0.03948700  |
| F  | 0.07609200  | -2.29175700 | 1.57425600  |
| F  | -0.19124500 | -2.93788100 | -0.62122100 |
| Cl | -4.78006600 | -1.49381800 | -0.24736000 |

28

Rotation of py ring w/ anion = 0.0, Rotation of py ring w/o anion = 150.0

|   |             |             |             |
|---|-------------|-------------|-------------|
| C | -1.59564300 | 1.41181500  | 0.03181400  |
| C | -1.56471600 | 2.80844200  | 0.04152400  |
| C | -2.89249900 | 3.25485200  | -0.02959400 |
| C | -3.69651900 | 2.11915900  | -0.08536100 |
| N | -2.91363800 | 1.02580300  | -0.04776000 |
| H | -3.28498900 | 0.06557700  | -0.09276600 |
| H | -0.67681800 | 3.42550500  | 0.09589300  |
| H | -3.23738200 | 4.27995500  | -0.04068500 |
| H | -4.77197800 | 2.02168600  | -0.15192200 |
| C | -0.52947700 | 0.45668500  | 0.07895300  |
| C | 0.82364900  | 0.83289200  | 0.11676200  |
| C | 1.79592900  | -0.14832300 | 0.01484300  |
| O | 1.48885300  | -1.41703300 | -0.06470300 |
| H | 1.09166400  | 1.88093400  | 0.10904900  |
| C | 3.20895700  | 0.14792400  | -0.13196500 |
| C | 4.20666000  | -0.61388200 | -0.71594200 |
| N | 3.79791000  | 1.27864500  | 0.38734100  |
| C | 5.42016600  | 0.09465100  | -0.56456700 |

|    |             |             |             |
|----|-------------|-------------|-------------|
| H  | 4.05509800  | -1.56558900 | -1.20738100 |
| C  | 5.13248500  | 1.25320800  | 0.13255800  |
| H  | 3.32996900  | 1.98871900  | 0.93029800  |
| H  | 6.39692600  | -0.20475700 | -0.91987400 |
| H  | 5.77786600  | 2.05133500  | 0.47210000  |
| B  | 0.11556900  | -1.89222000 | 0.25118000  |
| O  | -0.87762500 | -0.79775300 | 0.04226500  |
| F  | 0.07437800  | -2.27598000 | 1.59596300  |
| F  | -0.19635200 | -2.94751500 | -0.59129300 |
| Cl | -4.77024100 | -1.50518900 | -0.29555000 |

28

Rotation of py ring w/ anion = 0.0, Rotation of py ring w/o anion = 180.0

|   |             |             |             |
|---|-------------|-------------|-------------|
| C | -1.60445100 | 1.40127000  | 0.08055100  |
| C | -1.58395900 | 2.79632400  | 0.14103900  |
| C | -2.91539300 | 3.23551400  | 0.08018600  |
| C | -3.71010700 | 2.09734000  | -0.02556700 |
| N | -2.91832700 | 1.00917700  | -0.02555300 |
| H | -3.28234100 | 0.04855200  | -0.10401800 |
| H | -0.70105400 | 3.41755300  | 0.22281500  |
| H | -3.26791100 | 4.25776800  | 0.10675400  |
| H | -4.78428300 | 1.99336200  | -0.10260300 |
| C | -0.53106600 | 0.45092900  | 0.08650700  |
| C | 0.81692400  | 0.83016200  | 0.16721200  |
| C | 1.79798400  | -0.13619700 | -0.00501600 |
| O | 1.49128300  | -1.40260300 | -0.13274100 |
| H | 1.06932000  | 1.87659400  | 0.26961700  |
| C | 3.21032700  | 0.15232200  | -0.10363700 |
| C | 4.26353100  | -0.73691900 | -0.25886600 |
| N | 3.74703800  | 1.42017700  | -0.03815400 |
| C | 5.45445900  | 0.01782200  | -0.29060800 |
| H | 4.15945300  | -1.81053600 | -0.33785000 |
| C | 5.09689700  | 1.34746800  | -0.15072800 |
| H | 3.23188400  | 2.28073100  | 0.06750800  |
| H | 6.46205900  | -0.35911800 | -0.40150600 |
| H | 5.70408300  | 2.24168500  | -0.12435500 |

|    |             |             |             |
|----|-------------|-------------|-------------|
| B  | 0.12845100  | -1.88578800 | 0.21027500  |
| O  | -0.87307300 | -0.80328800 | -0.01431000 |
| F  | 0.10341300  | -2.24163900 | 1.56434500  |
| F  | -0.18137400 | -2.96076100 | -0.60697000 |
| Cl | -4.76760900 | -1.51709500 | -0.35107000 |

28

Rotation of py ring w/ anion = 30.0, Rotation of py ring w/o anion = 0.0

|    |             |             |             |
|----|-------------|-------------|-------------|
| C  | 1.67259700  | 1.38396100  | 0.23193700  |
| C  | 1.66766600  | 2.77261900  | 0.34539200  |
| C  | 3.00458800  | 3.20130200  | 0.25460600  |
| C  | 3.77933400  | 2.06425000  | 0.05819500  |
| N  | 2.97343300  | 0.98282200  | 0.04304100  |
| H  | 3.31689000  | 0.02312800  | -0.10768300 |
| H  | 0.79327300  | 3.39043200  | 0.50718200  |
| H  | 3.37143500  | 4.21646800  | 0.32631300  |
| H  | 4.84693800  | 1.95410000  | -0.07788200 |
| C  | 0.56952400  | 0.46017400  | 0.16308800  |
| C  | -0.72559000 | 0.86697500  | -0.16309700 |
| C  | -1.77300200 | -0.03148300 | 0.01326200  |
| O  | -1.55657300 | -1.27589700 | 0.35520600  |
| H  | -0.91664900 | 1.88498700  | -0.47391800 |
| C  | -3.16047900 | 0.33255800  | -0.12442800 |
| C  | -3.77277200 | 1.54353700  | -0.42363700 |
| N  | -4.15458000 | -0.59890400 | 0.06176500  |
| C  | -5.16411200 | 1.32099400  | -0.41761200 |
| H  | -3.26718500 | 2.47982700  | -0.62135600 |
| C  | -5.36347800 | -0.01674700 | -0.11242200 |
| H  | -3.98470100 | -1.56794200 | 0.29003200  |
| H  | -5.93976700 | 2.04904900  | -0.61222000 |
| H  | -6.27736400 | -0.58500000 | -0.00861000 |
| B  | -0.17655300 | -1.84587100 | 0.27540000  |
| O  | 0.82496200  | -0.77256600 | 0.51491500  |
| F  | 0.00936700  | -2.37651500 | -1.00420500 |
| F  | -0.04486400 | -2.81214000 | 1.25949100  |
| Cl | 4.64556800  | -1.62390300 | -0.56133800 |

28

Rotation of py ring w/ anion = 30.0, Rotation of py ring w/o anion = 30.0

|    |             |             |             |
|----|-------------|-------------|-------------|
| C  | 1.66813000  | 1.38933000  | 0.20325100  |
| C  | 1.65675400  | 2.78133100  | 0.28072800  |
| C  | 2.98557500  | 3.21597700  | 0.13485700  |
| C  | 3.76211000  | 2.07858600  | -0.05835800 |
| N  | 2.96549400  | 0.99216900  | -0.01946100 |
| H  | 3.31197000  | 0.03042800  | -0.15075400 |
| H  | 0.78302100  | 3.39681600  | 0.45430300  |
| H  | 3.34725900  | 4.23494600  | 0.16741800  |
| H  | 4.82558100  | 1.97290300  | -0.22658500 |
| C  | 0.56914100  | 0.46243800  | 0.19360700  |
| C  | -0.74134100 | 0.85605000  | -0.10665700 |
| C  | -1.77658400 | -0.03166300 | 0.15020000  |
| O  | -1.54863800 | -1.27687100 | 0.48447800  |
| H  | -0.94845900 | 1.85705200  | -0.45946600 |
| C  | -3.17177700 | 0.31959100  | 0.00246800  |
| C  | -3.81091200 | 1.55054200  | 0.01889000  |
| N  | -4.10585700 | -0.62973500 | -0.33786900 |
| C  | -5.16767200 | 1.32103700  | -0.29610900 |
| H  | -3.34642400 | 2.49997900  | 0.25260400  |
| C  | -5.31206600 | -0.03842900 | -0.51710000 |
| H  | -3.90846700 | -1.61637700 | -0.42320700 |
| H  | -5.95516200 | 2.05997600  | -0.35608800 |
| H  | -6.18219900 | -0.61872400 | -0.79088700 |
| B  | -0.17119600 | -1.84077700 | 0.35517400  |
| O  | 0.83417000  | -0.76091000 | 0.56421700  |
| F  | -0.02418300 | -2.36415900 | -0.93256300 |
| F  | 0.00166900  | -2.80838200 | 1.33025400  |
| Cl | 4.63891900  | -1.63081100 | -0.57325600 |

28

Rotation of py ring w/ anion = 30.0, Rotation of py ring w/o anion = 60.0

|   |            |            |            |
|---|------------|------------|------------|
| C | 1.63037700 | 1.39640400 | 0.18809700 |
| C | 1.58199700 | 2.79103500 | 0.23590900 |

|    |             |             |             |
|----|-------------|-------------|-------------|
| C  | 2.89027800  | 3.25859900  | 0.03915000  |
| C  | 3.69334200  | 2.13784800  | -0.15533600 |
| N  | 2.93233400  | 1.03151900  | -0.06891200 |
| H  | 3.30577200  | 0.07638100  | -0.18180100 |
| H  | 0.69611900  | 3.38554600  | 0.42049000  |
| H  | 3.22352700  | 4.28760600  | 0.03784600  |
| H  | 4.75415900  | 2.05947500  | -0.35345700 |
| C  | 0.55894800  | 0.44556500  | 0.21118800  |
| C  | -0.77799100 | 0.80990200  | -0.05224100 |
| C  | -1.77833400 | -0.09604600 | 0.23270400  |
| O  | -1.51932100 | -1.33946600 | 0.55363200  |
| H  | -1.02130100 | 1.80502100  | -0.39810500 |
| C  | -3.19660100 | 0.22847700  | 0.07349400  |
| C  | -3.91878800 | 1.32540100  | 0.50132300  |
| N  | -3.99455000 | -0.49196900 | -0.78109700 |
| C  | -5.20774000 | 1.23212700  | -0.08251000 |
| H  | -3.55569000 | 2.09185300  | 1.17407300  |
| C  | -5.21563700 | 0.10295500  | -0.87563800 |
| H  | -3.71980600 | -1.34407800 | -1.24736200 |
| H  | -6.03558000 | 1.91405700  | 0.05882400  |
| H  | -5.99116800 | -0.31827100 | -1.49995600 |
| B  | -0.13661700 | -1.87354200 | 0.39277700  |
| O  | 0.85407700  | -0.76793400 | 0.57564500  |
| F  | -0.00452500 | -2.38948100 | -0.89902500 |
| F  | 0.08735400  | -2.83395000 | 1.36261700  |
| Cl | 4.67529100  | -1.54648500 | -0.53692700 |

28

Rotation of py ring w/ anion = 30.0, Rotation of py ring w/o anion = 90.0

|   |             |            |             |
|---|-------------|------------|-------------|
| C | -1.61826100 | 1.39347600 | -0.20342900 |
| C | -1.54816700 | 2.78802200 | -0.26462600 |
| C | -2.85317900 | 3.27656200 | -0.11317000 |
| C | -3.67844400 | 2.16943100 | 0.07261200  |
| N | -2.93332500 | 1.05165400 | 0.02110400  |
| H | -3.32496200 | 0.10403600 | 0.14062900  |
| H | -0.64895500 | 3.36792900 | -0.43023100 |



|    |             |             |             |
|----|-------------|-------------|-------------|
| H  | -3.17078100 | 4.31019100  | -0.13466800 |
| H  | -4.74519000 | 2.10979900  | 0.24375600  |
| C  | -0.56342900 | 0.42811800  | -0.17480400 |
| C  | 0.77923500  | 0.78621800  | 0.10067800  |
| C  | 1.76907900  | -0.13860500 | -0.12268000 |
| O  | 1.51043100  | -1.37686500 | -0.45684300 |
| H  | 1.02916700  | 1.79457700  | 0.40098600  |
| C  | 3.20457300  | 0.20676100  | -0.00113600 |
| C  | 4.08510200  | 0.70171700  | -0.93585900 |
| N  | 3.87483000  | 0.07533300  | 1.18751200  |
| C  | 5.33905800  | 0.86574600  | -0.28177400 |
| H  | 3.85020400  | 0.91696800  | -1.97015000 |
| C  | 5.17375500  | 0.47088400  | 1.02576200  |
| H  | 3.47575600  | -0.27427700 | 2.04571400  |
| H  | 6.25534500  | 1.23470700  | -0.72321500 |
| H  | 5.86949800  | 0.43976300  | 1.85240700  |
| B  | 0.12208100  | -1.90361200 | -0.33678300 |
| O  | -0.86081500 | -0.78613100 | -0.52222500 |
| F  | -0.04581200 | -2.43654400 | 0.94252900  |
| F  | -0.09063300 | -2.84365900 | -1.32773500 |
| Cl | -4.72328600 | -1.48463200 | 0.49931300  |

28

Rotation of py ring w/ anion = 30.0, Rotation of py ring w/o anion = 120.0

|   |             |             |             |
|---|-------------|-------------|-------------|
| C | -1.62210100 | 1.38015300  | -0.26107500 |
| C | -1.56008400 | 2.76506700  | -0.42196200 |
| C | -2.87365500 | 3.25245700  | -0.33149900 |
| C | -3.69396300 | 2.15574100  | -0.08444000 |
| N | -2.93758600 | 1.04264100  | -0.04111200 |
| H | -3.32363500 | 0.10217700  | 0.13412000  |
| H | -0.66255000 | 3.33960200  | -0.61348600 |
| H | -3.19777200 | 4.27926900  | -0.43439700 |
| H | -4.76360300 | 2.09794200  | 0.06780000  |
| C | -0.56022800 | 0.42015200  | -0.16087700 |
| C | 0.76946400  | 0.79958700  | 0.10686700  |
| C | 1.77243800  | -0.13925100 | -0.03105800 |

|    |             |             |             |
|----|-------------|-------------|-------------|
| O  | 1.52194800  | -1.38302300 | -0.33708000 |
| H  | 1.00899600  | 1.83091400  | 0.32950000  |
| C  | 3.19423800  | 0.22323400  | 0.01985600  |
| C  | 4.20567300  | -0.04957000 | -0.87812500 |
| N  | 3.75712400  | 0.81568100  | 1.12340300  |
| C  | 5.41164700  | 0.43322000  | -0.30695000 |
| H  | 4.07759400  | -0.52835200 | -1.83999300 |
| C  | 5.10086000  | 0.95030200  | 0.93291700  |
| H  | 3.25848400  | 1.08318000  | 1.95899400  |
| H  | 6.39683700  | 0.40233400  | -0.75282000 |
| H  | 5.72722600  | 1.39498600  | 1.69338800  |
| B  | 0.13198600  | -1.91686300 | -0.24360100 |
| O  | -0.85544200 | -0.81242300 | -0.44878100 |
| F  | -0.05200100 | -2.45431900 | 1.03131600  |
| F  | -0.05039200 | -2.86132600 | -1.23852700 |
| Cl | -4.71732500 | -1.48048000 | 0.57345400  |

28

Rotation of py ring w/ anion = 30.0, Rotation of py ring w/o anion = 150.0

|   |             |             |             |
|---|-------------|-------------|-------------|
| C | -1.61115400 | 1.37767300  | -0.27921900 |
| C | -1.55178600 | 2.75851800  | -0.45919200 |
| C | -2.86669500 | 3.24684300  | -0.36124900 |
| C | -3.68377300 | 2.15327000  | -0.09824900 |
| N | -2.92383200 | 1.04060300  | -0.04900200 |
| H | -3.30650000 | 0.10182700  | 0.13671800  |
| H | -0.65640200 | 3.33167100  | -0.66470200 |
| H | -3.19217100 | 4.27236800  | -0.47328800 |
| H | -4.75250100 | 2.09460500  | 0.05959400  |
| C | -0.54621400 | 0.41484900  | -0.17559500 |
| C | 0.77432100  | 0.79156300  | 0.09852100  |
| C | 1.78363300  | -0.15502800 | -0.02697400 |
| O | 1.52048000  | -1.39819100 | -0.32494200 |
| H | 1.00286400  | 1.82764000  | 0.30954700  |
| C | 3.19269000  | 0.17771100  | 0.04469200  |
| C | 4.27735600  | -0.47997300 | -0.51184200 |
| N | 3.67995000  | 1.22643500  | 0.79223700  |

|    |             |             |             |
|----|-------------|-------------|-------------|
| C  | 5.44078700  | 0.21244800  | -0.10875800 |
| H  | 4.21583300  | -1.35080900 | -1.15071800 |
| C  | 5.03509200  | 1.25263600  | 0.70716600  |
| H  | 3.12957200  | 1.84230800  | 1.37185800  |
| H  | 6.46262700  | -0.01985500 | -0.37634600 |
| H  | 5.60973500  | 1.99851100  | 1.23844800  |
| B  | 0.12786900  | -1.92308800 | -0.22631600 |
| O  | -0.85204500 | -0.82098300 | -0.45302900 |
| F  | -0.06113000 | -2.44207200 | 1.05686400  |
| F  | -0.05203300 | -2.88611800 | -1.20555500 |
| Cl | -4.71998600 | -1.47929700 | 0.59200000  |

28

Rotation of py ring w/ anion = 30.0, Rotation of py ring w/o anion = 180.0

|   |             |             |             |
|---|-------------|-------------|-------------|
| C | 1.61452000  | 1.38362300  | 0.22602700  |
| C | 1.56587700  | 2.77037800  | 0.35376900  |
| C | 2.88644800  | 3.24395400  | 0.25503600  |
| C | 3.69634600  | 2.13486800  | 0.04097400  |
| N | 2.92662300  | 1.02780800  | 0.02247400  |
| H | 3.30311700  | 0.07998100  | -0.12540900 |
| H | 0.67324200  | 3.35754200  | 0.52975000  |
| H | 3.21966900  | 4.27015900  | 0.33302600  |
| H | 4.76609300  | 2.06115100  | -0.10291600 |
| C | 0.54442100  | 0.42235100  | 0.15745100  |
| C | -0.76886200 | 0.78747300  | -0.15342500 |
| C | -1.78797600 | -0.14284300 | 0.03668700  |
| O | -1.52002400 | -1.37776300 | 0.36975100  |
| H | -0.97673800 | 1.80238800  | -0.46352100 |
| C | -3.19377600 | 0.16498400  | -0.06462300 |
| C | -4.27734800 | -0.69039700 | 0.08020300  |
| N | -3.69294500 | 1.41560500  | -0.36137400 |
| C | -5.44683000 | 0.06770800  | -0.12872900 |
| H | -4.20563300 | -1.74552600 | 0.30698600  |
| C | -5.04679700 | 1.36532800  | -0.40004200 |
| H | -3.15218000 | 2.25307700  | -0.51444500 |
| H | -6.46836100 | -0.28516400 | -0.09021600 |

H -5.62782300 2.25109500 -0.61666900  
B -0.13035300 -1.90193800 0.24405400  
O 0.84435700 -0.80221600 0.49490400  
F 0.05118100 -2.38738500 -1.05455000  
F 0.05574000 -2.89013000 1.19634100  
Cl 4.71832600 -1.51447100 -0.51281600

28

Rotation of py ring w/ anion = 60.0, Rotation of py ring w/o anion = 0.0

C -1.77802600 1.22092500 -0.51417000  
C -1.83359900 2.53928800 -0.93780700  
C -3.15631600 2.99097400 -0.71625300  
C -3.84351000 1.94654300 -0.12353400  
N -3.00523400 0.88713400 -0.00098600  
H -3.27988600 -0.00342200 0.43570300  
H -1.01396200 3.09076400 -1.38148000  
H -3.56202000 3.96431700 -0.95881300  
H -4.86517300 1.87874100 0.22545100  
C -0.61525700 0.34216100 -0.40841800  
C 0.58403000 0.78731400 0.12200800  
C 1.72759000 -0.00867400 -0.03724700  
O 1.65213900 -1.19912400 -0.56133500  
H 0.64639800 1.76352000 0.58250400  
C 3.04796300 0.42986300 0.31525400  
C 3.51248400 1.62778200 0.85003900  
N 4.13651900 -0.39323100 0.13782200  
C 4.90675200 1.50776300 0.99329100  
H 2.90595800 2.48696400 1.10551500  
C 5.25753400 0.24283500 0.54136000  
H 4.08295200 -1.33020900 -0.23573200  
H 5.58821700 2.25284800 1.38027500  
H 6.22392700 -0.23827800 0.48229200  
B 0.32179700 -1.86800800 -0.74761100  
O -0.72696300 -0.83866600 -0.96057200  
F 0.03566000 -2.59980300 0.40486000  
F 0.39704300 -2.67561900 -1.87057700

Cl -4.37694100 -1.52717900 1.52965000

28

Rotation of py ring w/ anion = 60.0, Rotation of py ring w/o anion = 30.0

C 1.80659800 1.23797800 0.47785300  
C 1.88523000 2.56851200 0.85968700  
C 3.19622800 3.00752400 0.56153700  
C 3.85134200 1.94298400 -0.03344300  
N 3.00654000 0.88386700 -0.08435000  
H 3.25195700 -0.02133300 -0.51121100  
H 1.08911100 3.13606900 1.32530400  
H 3.61660500 3.98532200 0.75621700  
H 4.85423900 1.86302500 -0.43091700  
C 0.63424000 0.36872200 0.44984900  
C -0.58745500 0.80921500 -0.04328400  
C -1.72551500 0.03179100 0.19296900  
O -1.63790500 -1.15979300 0.71323000  
H -0.66422800 1.76326200 -0.54601700  
C -3.05317600 0.44667500 -0.18581600  
C -3.58205800 1.70618400 -0.43670100  
N -4.01420800 -0.48068200 -0.51582000  
C -4.90003400 1.52039800 -0.90039600  
H -3.07204500 2.64813900 -0.28062200  
C -5.12958500 0.15399300 -0.94458800  
H -3.89164800 -1.48014800 -0.43775200  
H -5.60782900 2.29006100 -1.17635400  
H -6.00257700 -0.40254800 -1.25599200  
B -0.30466800 -1.82962600 0.86447000  
O 0.75647900 -0.79863300 1.02223300  
F -0.06127500 -2.58196300 -0.28400000  
F -0.33927400 -2.61526000 2.00435500  
Cl 4.19322900 -1.63396700 -1.58333600

28

Rotation of py ring w/ anion = 60.0, Rotation of py ring w/o anion = 60.0

C 1.77874200 1.25348700 0.44410100

|    |             |             |             |
|----|-------------|-------------|-------------|
| C  | 1.81939600  | 2.59064200  | 0.81193500  |
| C  | 3.11206800  | 3.06586900  | 0.49521300  |
| C  | 3.79077600  | 2.01747800  | -0.10373700 |
| N  | 2.97970200  | 0.93285100  | -0.13574600 |
| H  | 3.24807100  | 0.02922700  | -0.55381200 |
| H  | 1.01200300  | 3.13738300  | 1.28286400  |
| H  | 3.50476600  | 4.05755800  | 0.67663300  |
| H  | 4.78929600  | 1.96659800  | -0.51670200 |
| C  | 0.63123400  | 0.35538200  | 0.44701700  |
| C  | -0.62105000 | 0.76904600  | -0.01755100 |
| C  | -1.72981200 | -0.01867700 | 0.26531500  |
| O  | -1.61337800 | -1.20542500 | 0.78914500  |
| H  | -0.73392700 | 1.71701800  | -0.52458500 |
| C  | -3.08331800 | 0.36649700  | -0.12761100 |
| C  | -3.74796500 | 1.57051300  | 0.01008800  |
| N  | -3.82701300 | -0.43025600 | -0.96409300 |
| C  | -4.95382300 | 1.46894500  | -0.72640400 |
| H  | -3.40296500 | 2.41515600  | 0.59267600  |
| C  | -4.96357200 | 0.22421300  | -1.32403600 |
| H  | -3.57610900 | -1.36708600 | -1.24445100 |
| H  | -5.72638600 | 2.22085900  | -0.81433400 |
| H  | -5.68728000 | -0.24043000 | -1.97897600 |
| B  | -0.27216400 | -1.85128200 | 0.94692000  |
| O  | 0.78672100  | -0.79902100 | 1.02312000  |
| F  | -0.04139200 | -2.66078900 | -0.16164300 |
| F  | -0.26492500 | -2.56875200 | 2.13013500  |
| Cl | 4.17874000  | -1.59276300 | -1.60091600 |

28

Rotation of py ring w/ anion = 60.0, Rotation of py ring w/o anion = 90.0

|   |             |            |             |
|---|-------------|------------|-------------|
| C | -1.76038600 | 1.26830700 | -0.44520900 |
| C | -1.74670700 | 2.61117700 | -0.79641100 |
| C | -3.03453600 | 3.12150800 | -0.52171400 |
| C | -3.76581800 | 2.08779500 | 0.04078100  |
| N | -2.99103700 | 0.97850800 | 0.08775900  |
| H | -3.29474100 | 0.08070300 | 0.49574700  |

|    |             |             |             |
|----|-------------|-------------|-------------|
| H  | -0.90692900 | 3.13858200  | -1.23142100 |
| H  | -3.38997800 | 4.12651200  | -0.70641500 |
| H  | -4.77887900 | 2.06491000  | 0.41943200  |
| C  | -0.64203300 | 0.33742900  | -0.40561700 |
| C  | 0.61308900  | 0.72518000  | 0.09203400  |
| C  | 1.70259000  | -0.09107400 | -0.14530000 |
| O  | 1.58689600  | -1.25639400 | -0.70954100 |
| H  | 0.73694500  | 1.68182700  | 0.58021900  |
| C  | 3.07910100  | 0.31695900  | 0.21815200  |
| C  | 4.01890100  | 1.01810700  | -0.50209900 |
| N  | 3.61016500  | 0.02833600  | 1.44813400  |
| C  | 5.16702300  | 1.14722500  | 0.32925100  |
| H  | 3.89043400  | 1.39250000  | -1.50934500 |
| C  | 4.88100100  | 0.52692300  | 1.52352500  |
| H  | 3.14199400  | -0.48463200 | 2.18013100  |
| H  | 6.09569300  | 1.64167500  | 0.07705700  |
| H  | 5.47221300  | 0.39927300  | 2.41929600  |
| B  | 0.24279100  | -1.88043400 | -0.91814100 |
| O  | -0.80353000 | -0.80829500 | -0.98701000 |
| F  | -0.02895600 | -2.71341000 | 0.16092500  |
| F  | 0.25035200  | -2.55942100 | -2.12201000 |
| Cl | -4.22632000 | -1.53713600 | 1.53015100  |

28

Rotation of py ring w/ anion = 60.0, Rotation of py ring w/o anion = 120.0

|   |             |             |             |
|---|-------------|-------------|-------------|
| C | 1.75000700  | -1.21658000 | -0.56040400 |
| C | 1.75721300  | -2.52792800 | -1.01184800 |
| C | 3.05648600  | -3.03653000 | -0.78460100 |
| C | 3.77768300  | -2.03334300 | -0.16008400 |
| N | 2.98341400  | -0.94356000 | -0.02533600 |
| H | 3.28204100  | -0.07591300 | 0.44354800  |
| H | 0.92180300  | -3.03737700 | -1.47583300 |
| H | 3.42589500  | -4.01940900 | -1.04568300 |
| H | 4.79572500  | -2.01725800 | 0.20531900  |
| C | 0.62149400  | -0.30121600 | -0.43099000 |
| C | -0.61042500 | -0.73484000 | 0.06157000  |

C -1.71467800 0.10359100 -0.05511800  
O -1.61672700 1.29628700 -0.55717200  
H -0.71756100 -1.73815100 0.45142400  
C -3.07537100 -0.35944600 0.22662300  
C -4.21738000 -0.25814900 -0.54339900  
N -3.43882500 -0.84463600 1.45959000  
C -5.29256900 -0.74614700 0.24079600  
H -4.25771800 0.11206400 -1.55938200  
C -4.77899500 -1.08705500 1.47527100  
H -2.81409100 -0.98235800 2.24039700  
H -6.32740500 -0.83521800 -0.06142900  
H -5.26122500 -1.47573000 2.36114600  
B -0.27851300 1.94008100 -0.76180800  
O 0.76885900 0.88829900 -0.93193600  
F 0.01715600 2.70192700 0.36432300  
F -0.32929400 2.70254800 -1.91483800  
Cl 4.32261000 1.40912900 1.60766800

28

Rotation of py ring w/ anion = 60.0, Rotation of py ring w/o anion = 150.0

C 1.73487300 -1.19658500 -0.57974600  
C 1.74364300 -2.49087900 -1.07528200  
C 3.04803800 -3.00175300 -0.87600200  
C 3.77079100 -2.01655000 -0.22686500  
N 2.97175600 -0.93505800 -0.04876400  
H 3.27167500 -0.08169100 0.44351200  
H 0.90688100 -2.98717900 -1.55098000  
H 3.41889500 -3.97409100 -1.17240400  
H 4.79249000 -2.00676300 0.12839100  
C 0.60630900 -0.28064100 -0.42838700  
C -0.61457100 -0.71638100 0.06868400  
C -1.73082500 0.12196100 -0.04743000  
O -1.62198900 1.32051100 -0.53710500  
H -0.70787200 -1.72785400 0.44043500  
C -3.07728400 -0.31810000 0.23374600  
C -4.27984000 0.17830300 -0.24775000



|    |             |             |             |
|----|-------------|-------------|-------------|
| N  | -3.37172700 | -1.29853500 | 1.15643300  |
| C  | -5.31432100 | -0.54585100 | 0.37953100  |
| H  | -4.37696700 | 0.96392700  | -0.98505900 |
| C  | -4.71653400 | -1.43993700 | 1.25169400  |
| H  | -2.70130700 | -1.79631700 | 1.72336800  |
| H  | -6.37789500 | -0.43015000 | 0.22184500  |
| H  | -5.15133800 | -2.15548800 | 1.93559700  |
| B  | -0.28079700 | 1.96460100  | -0.70723500 |
| O  | 0.75973300  | 0.91912300  | -0.91507000 |
| F  | 0.01091300  | 2.68293300  | 0.45103100  |
| F  | -0.32547500 | 2.77771300  | -1.82744700 |
| Cl | 4.34333200  | 1.36372600  | 1.64057500  |

28

Rotation of py ring w/ anion = 60.0, Rotation of py ring w/o anion = 180.0

|   |             |             |             |
|---|-------------|-------------|-------------|
| C | -1.72733900 | 1.20855500  | -0.53801800 |
| C | -1.72763400 | 2.51951200  | -0.98797800 |
| C | -3.02868300 | 3.03165500  | -0.77080600 |
| C | -3.75810800 | 2.02828200  | -0.15770200 |
| N | -2.96600600 | 0.93620500  | -0.01703200 |
| H | -3.27506800 | 0.06691200  | 0.44030500  |
| H | -0.88693800 | 3.02649800  | -1.44507500 |
| H | -3.39362000 | 4.01624300  | -1.03213700 |
| H | -4.78082300 | 2.01141700  | 0.19447600  |
| C | -0.59874500 | 0.28784100  | -0.42018000 |
| C | 0.61826300  | 0.70400900  | 0.09817900  |
| C | 1.74201800  | -0.12090700 | -0.06411500 |
| O | 1.62409400  | -1.31303900 | -0.57212900 |
| H | 0.69169500  | 1.68509200  | 0.54622500  |
| C | 3.08362000  | 0.28277900  | 0.25669200  |
| C | 4.25962900  | -0.45199400 | 0.15948900  |
| N | 3.41486800  | 1.52473000  | 0.75921000  |
| C | 5.30985500  | 0.36943000  | 0.60838600  |
| H | 4.32486100  | -1.47103800 | -0.19734200 |
| C | 4.74944600  | 1.58423800  | 0.97193400  |
| H | 2.77652100  | 2.28481000  | 0.93871300  |

|    |             |             |             |
|----|-------------|-------------|-------------|
| H  | 6.35903800  | 0.11460600  | 0.66765900  |
| H  | 5.20866300  | 2.48032200  | 1.36596100  |
| B  | 0.27850400  | -1.94931200 | -0.72357200 |
| O  | -0.75081500 | -0.89679300 | -0.94747000 |
| F  | -0.01687400 | -2.64593900 | 0.44833800  |
| F  | 0.31266500  | -2.78269700 | -1.82946900 |
| Cl | -4.39654000 | -1.40111000 | 1.56444100  |

28

Rotation of py ring w/ anion = 90.0, Rotation of py ring w/o anion = 0.0

|   |             |             |             |
|---|-------------|-------------|-------------|
| C | 2.33185500  | 0.11722000  | -0.78548400 |
| C | 3.13334800  | 0.55729900  | -1.81827000 |
| C | 4.35841400  | -0.15849500 | -1.71811800 |
| C | 4.25338000  | -0.99247700 | -0.62452500 |
| N | 3.02434300  | -0.81313800 | -0.06197000 |
| H | 2.64393400  | -1.32964000 | 0.74258500  |
| H | 2.86332700  | 1.30344200  | -2.55477300 |
| H | 5.21634900  | -0.06885600 | -2.37189900 |
| H | 4.95460200  | -1.69987400 | -0.20343000 |
| C | 0.96826300  | 0.54036400  | -0.39440500 |
| C | -0.15190600 | -0.13167200 | -0.82692200 |
| C | -1.40152300 | 0.21045200  | -0.27149900 |
| O | -1.52169000 | 1.23252100  | 0.52178100  |
| H | -0.05332000 | -0.98179900 | -1.48779800 |
| C | -2.59307800 | -0.54724100 | -0.50176000 |
| C | -2.82183700 | -1.70011900 | -1.24940600 |
| N | -3.79322400 | -0.17553300 | 0.06190900  |
| C | -4.18571400 | -2.01354200 | -1.12563600 |
| H | -2.07874000 | -2.24898700 | -1.81298500 |
| C | -4.75488300 | -1.04819600 | -0.30437600 |
| H | -3.91339300 | 0.62658100  | 0.66405400  |
| H | -4.70486700 | -2.84849800 | -1.57551800 |
| H | -5.77371200 | -0.93148100 | 0.03839000  |
| B | -0.40219200 | 2.21718800  | 0.69421600  |
| O | 0.89952500  | 1.56026800  | 0.42111500  |
| F | -0.42311300 | 2.67896600  | 1.99800500  |

F -0.59458200 3.25270100 -0.22622100  
Cl 1.62103600 -2.39500000 2.31317000

28

Rotation of py ring w/ anion = 90.0, Rotation of py ring w/o anion = 30.0

C 2.34793400 0.05635700 -0.75831600  
C 3.22928600 0.46810100 -1.73612300  
C 4.40736200 -0.31323100 -1.57895000  
C 4.19388100 -1.16038800 -0.51167200  
N 2.94510000 -0.92516500 -0.01766300  
H 2.49354800 -1.42959500 0.75723300  
H 3.04413200 1.24126900 -2.47092200  
H 5.30589000 -0.25856000 -2.17984200  
H 4.83028300 -1.91258600 -0.06597200  
C 0.99530800 0.55514500 -0.42247300  
C -0.14484300 -0.05417800 -0.90038800  
C -1.39068500 0.34662300 -0.38376200  
O -1.48066800 1.33470200 0.45402500  
H -0.06926800 -0.91393100 -1.55175700  
C -2.60264300 -0.39141500 -0.61372400  
C -2.94302500 -1.29584600 -1.61316100  
N -3.62217600 -0.38938100 0.31004500  
C -4.21000300 -1.81680200 -1.28934500  
H -2.34454600 -1.53112000 -2.48386600  
C -4.59339500 -1.24202800 -0.08628300  
H -3.62674500 0.16633200 1.15346100  
H -4.78363500 -2.53476900 -1.85921300  
H -5.48224800 -1.39046900 0.51099400  
B -0.32513100 2.26048300 0.69531500  
O 0.95391300 1.56300100 0.40581600  
F -0.34650900 2.65152600 2.02172000  
F -0.45594600 3.34941100 -0.17035400  
Cl 1.33522700 -2.44948600 2.26416500

28

Rotation of py ring w/ anion = 90.0, Rotation of py ring w/o anion = 60.0

|    |             |             |             |
|----|-------------|-------------|-------------|
| C  | 2.37903500  | -0.10633900 | -0.69116200 |
| C  | 3.33568800  | 0.19321800  | -1.63795100 |
| C  | 4.41701200  | -0.70519300 | -1.42023400 |
| C  | 4.07042200  | -1.50997400 | -0.35511100 |
| N  | 2.83423200  | -1.13658400 | 0.08263800  |
| H  | 2.28490700  | -1.57069300 | 0.83558800  |
| H  | 3.26443400  | 0.97013300  | -2.38830000 |
| H  | 5.34066600  | -0.75449100 | -1.98215200 |
| H  | 4.60400900  | -2.31898800 | 0.12448000  |
| C  | 1.06926600  | 0.52661100  | -0.42069200 |
| C  | -0.10941900 | 0.01504700  | -0.94010800 |
| C  | -1.31980600 | 0.48131700  | -0.41811900 |
| O  | -1.35527200 | 1.46126000  | 0.43122000  |
| H  | -0.08974500 | -0.85211700 | -1.58541600 |
| C  | -2.57447600 | -0.23413000 | -0.61943400 |
| C  | -3.12854700 | -0.75476600 | -1.77447500 |
| N  | -3.30414100 | -0.69985400 | 0.44616400  |
| C  | -4.25814000 | -1.51558800 | -1.38704900 |
| H  | -2.76472700 | -0.58293800 | -2.77945000 |
| C  | -4.32682200 | -1.47168700 | -0.00806200 |
| H  | -3.10063800 | -0.50588000 | 1.41598400  |
| H  | -4.94170300 | -2.04149400 | -2.03978700 |
| H  | -5.01821300 | -1.93599800 | 0.68099700  |
| B  | -0.15365200 | 2.33239000  | 0.63870100  |
| O  | 1.08375200  | 1.53486600  | 0.39766500  |
| F  | -0.15627800 | 2.79089600  | 1.94043700  |
| F  | -0.20309600 | 3.37338400  | -0.28924200 |
| Cl | 0.73881500  | -2.24547300 | 2.19796900  |

28

Rotation of py ring w/ anion = 90.0, Rotation of py ring w/o anion = 90.0

|   |            |             |             |
|---|------------|-------------|-------------|
| C | 2.44516200 | -0.20981400 | -0.62900900 |
| C | 3.56551000 | 0.00501900  | -1.40103400 |
| C | 4.47403200 | -1.04762000 | -1.09876200 |
| C | 3.87426800 | -1.84787300 | -0.14959500 |
| N | 2.64516200 | -1.32894400 | 0.13361600  |

H 1.94353700 -1.71101200 0.77408700  
H 3.70973600 0.82042700 -2.09790200  
H 5.45508000 -1.19742100 -1.53014200  
H 4.22401400 -2.74321000 0.34526200  
C 1.19850000 0.56496900 -0.45183000  
C 0.00875300 0.16730500 -1.05544100  
C -1.16861300 0.54861000 -0.41998300  
O -1.19336100 1.50100600 0.45565200  
H 0.00471400 -0.65150700 -1.76163000  
C -2.42962100 -0.19850500 -0.61523500  
C -3.47081200 -0.02224100 -1.49936000  
N -2.73278300 -1.23953100 0.21967600  
C -4.44108800 -1.01526300 -1.18527200  
H -3.52916300 0.73668500 -2.26870400  
C -3.94992600 -1.74919400 -0.12679800  
H -2.07343900 -1.61974500 0.90358600  
H -5.39102800 -1.16918900 -1.68021600  
H -4.36665300 -2.59513000 0.40189700  
B 0.01674700 2.36592200 0.63179400  
O 1.23093000 1.51206100 0.42942500  
F 0.02932500 2.87055900 1.91310600  
F 0.00016100 3.36667600 -0.33832900  
Cl -0.03824100 -2.06659900 1.87188500

28

Rotation of py ring w/ anion = 90.0, Rotation of py ring w/o anion = 120.0

C 2.44320400 -0.11904700 -0.54053200  
C 3.56563100 0.18911600 -1.27807800  
C 4.54918000 -0.78554900 -0.95235200  
C 3.99181600 -1.63194700 -0.01783100  
N 2.72183400 -1.20789000 0.24373700  
H 2.01281600 -1.72006400 0.77537300  
H 3.66562400 1.02347400 -1.96035700  
H 5.54941500 -0.85647300 -1.35930700  
H 4.39498600 -2.50545100 0.47561500  
C 1.17122200 0.60901100 -0.34808600

C -0.01622200 0.15300900 -0.89733200  
C -1.20659800 0.57604200 -0.29737200  
O -1.24475100 1.61926900 0.46829300  
H -0.01528600 -0.69180100 -1.57245600  
C -2.46364400 -0.13788300 -0.50529800  
C -3.71387200 0.32340800 -0.87574100  
N -2.57906200 -1.45607100 -0.13865300  
C -4.60064600 -0.77576900 -0.77287300  
H -3.94302500 1.32956300 -1.20218900  
C -3.86889400 -1.84936900 -0.29747600  
H -1.81486100 -2.00972100 0.26540400  
H -5.65543700 -0.78300300 -1.01392900  
H -4.17336500 -2.85848300 -0.05608300  
B -0.01574900 2.46803300 0.61762500  
O 1.18751300 1.58849000 0.50772500  
F -0.03137200 3.05514600 1.86590700  
F 0.00749300 3.40802000 -0.41264400  
Cl 0.03672000 -2.80924500 1.27262000

0

Rotation of py ring w/ anion = 90.0, Rotation of py ring w/o anion = 150.0

28

Rotation of py ring w/ anion = 90.0, Rotation of py ring w/o anion = 180.0

C 2.31990700 0.10359300 -0.73709900  
C 3.16479400 0.53697000 -1.73756800  
C 4.36991100 -0.20669500 -1.60512700  
C 4.20984000 -1.05087100 -0.52616200  
N 2.96804700 -0.84885100 -0.00062900  
H 2.54178600 -1.38812800 0.76491600  
H 2.93885100 1.30214800 -2.46935700  
H 5.25104400 -0.12915800 -2.22884900  
H 4.87883700 -1.78241400 -0.09400100  
C 0.97018700 0.58132100 -0.36099700  
C -0.17352800 -0.05774700 -0.78635100  
C -1.41075600 0.31479700 -0.21831900

|    |             |             |             |
|----|-------------|-------------|-------------|
| O  | -1.49101300 | 1.34788600  | 0.56362500  |
| H  | -0.08506800 | -0.90880400 | -1.44748300 |
| C  | -2.62535100 | -0.42269700 | -0.39967300 |
| C  | -3.89869500 | -0.13177000 | 0.08127300  |
| N  | -2.72310700 | -1.57850500 | -1.14873000 |
| C  | -4.76491700 | -1.13558700 | -0.38264300 |
| H  | -4.14732200 | 0.72352700  | 0.69498200  |
| C  | -4.00117200 | -2.01487300 | -1.13770700 |
| H  | -1.96124700 | -2.06355500 | -1.59824400 |
| H  | -5.82645900 | -1.22102200 | -0.19588500 |
| H  | -4.28282000 | -2.91839500 | -1.66065700 |
| B  | -0.35338600 | 2.31210800  | 0.68283900  |
| O  | 0.93399600  | 1.60639300  | 0.44697800  |
| F  | -0.35668500 | 2.84424300  | 1.95906700  |
| F  | -0.51313300 | 3.30107900  | -0.29415400 |
| Cl | 1.41576100  | -2.60141300 | 2.15641700  |

28

Rotation of py ring w/ anion = 120.0, Rotation of py ring w/o anion = 0.0

|   |             |             |             |
|---|-------------|-------------|-------------|
| C | 1.58601100  | 1.43014700  | 0.01266500  |
| C | 1.54144500  | 2.82805700  | 0.00391600  |
| C | 2.86314900  | 3.28568400  | -0.07233000 |
| C | 3.67906700  | 2.15613800  | -0.11045100 |
| N | 2.90925600  | 1.05600800  | -0.05760300 |
| H | 3.29121300  | 0.09844600  | -0.08511500 |
| H | 0.64735100  | 3.43648500  | 0.05227800  |
| H | 3.19827400  | 4.31364100  | -0.09825200 |
| H | 4.75580800  | 2.07008800  | -0.17291900 |
| C | 0.52898700  | 0.47365200  | 0.09394200  |
| C | -0.83186100 | 0.84947200  | 0.13522500  |
| C | -1.79360800 | -0.13178900 | 0.18598000  |
| O | -1.50001500 | -1.40860300 | 0.16049800  |
| H | -1.12000800 | 1.89052000  | 0.09358100  |
| C | -3.22494100 | 0.17641400  | 0.11148000  |
| C | -3.97916300 | 1.10455600  | 0.80087200  |
| N | -4.00501500 | -0.33497200 | -0.89557600 |

|    |             |             |             |
|----|-------------|-------------|-------------|
| C  | -5.27063700 | 1.11497900  | 0.21215600  |
| H  | -3.63642900 | 1.69074900  | 1.64393700  |
| C  | -5.24824700 | 0.22003700  | -0.83690100 |
| H  | -3.70882200 | -1.04059000 | -1.55368500 |
| H  | -6.12095400 | 1.70746000  | 0.52242600  |
| H  | -6.01516600 | -0.06281400 | -1.54426900 |
| B  | -0.09966000 | -1.90641200 | 0.22252900  |
| O  | 0.87576100  | -0.77790000 | 0.09863200  |
| F  | 0.10720000  | -2.78869100 | -0.83183900 |
| F  | 0.10096600  | -2.52700100 | 1.45447600  |
| Cl | 4.75862800  | -1.49000000 | -0.24673400 |

28

Rotation of py ring w/ anion = 120.0, Rotation of py ring w/o anion = 30.0

|   |             |             |             |
|---|-------------|-------------|-------------|
| C | 1.63699700  | 1.39989100  | 0.19640100  |
| C | 1.58564100  | 2.79437200  | 0.24053100  |
| C | 2.89522400  | 3.26334300  | 0.05457300  |
| C | 3.70115200  | 2.14353500  | -0.13299900 |
| N | 2.94134600  | 1.03599500  | -0.04847000 |
| H | 3.31148900  | 0.08097200  | -0.17440200 |
| H | 0.69772400  | 3.38766100  | 0.41907200  |
| H | 3.22716200  | 4.29278200  | 0.05447200  |
| H | 4.76303600  | 2.06688200  | -0.32581800 |
| C | 0.56595900  | 0.44836200  | 0.22196000  |
| C | -0.76929000 | 0.81039100  | -0.05341800 |
| C | -1.77176600 | -0.09153300 | 0.23633600  |
| O | -1.51522100 | -1.33102800 | 0.57431400  |
| H | -1.00987900 | 1.80134700  | -0.41284000 |
| C | -3.18883500 | 0.23156900  | 0.06455500  |
| C | -3.91183000 | 1.33645100  | 0.47025200  |
| N | -3.98154000 | -0.49918500 | -0.78623600 |
| C | -5.19607700 | 1.23779400  | -0.12282400 |
| H | -3.55257800 | 2.11141500  | 1.13529200  |
| C | -5.20017800 | 0.09722400  | -0.89971100 |
| H | -3.70449700 | -1.35780400 | -1.23900900 |
| H | -6.02324800 | 1.92385400  | 0.00140200  |



H -5.97148700 -0.33098000 -1.52450200  
B -0.13246900 -1.86843000 0.42797100  
O 0.85891600 -0.76118700 0.59994600  
F 0.00576500 -2.40313300 -0.85530400  
F 0.08612300 -2.81474400 1.41296600  
Cl 4.62043800 -1.57184900 -0.60573800

28

Rotation of py ring w/ anion = 120.0, Rotation of py ring w/o anion = 60.0

C 2.41432400 -0.02650600 -0.46982700  
C 3.63992000 0.50146600 -0.84347900  
C 4.60016200 -0.52055500 -0.66448600  
C 3.93305500 -1.61576500 -0.14246900  
N 2.61809400 -1.30728500 -0.02115900  
H 1.89365300 -1.93891600 0.35311500  
H 3.80416400 1.50362100 -1.21836800  
H 5.65838700 -0.46418100 -0.88308800  
H 4.30052700 -2.58717300 0.15962600  
C 1.12657500 0.64256300 -0.31349000  
C -0.06441800 0.05434900 -0.73843700  
C -1.26917600 0.60463800 -0.31594700  
O -1.30886800 1.70361900 0.38209700  
H -0.04959600 -0.88864800 -1.26822500  
C -2.53751900 -0.10511500 -0.46009300  
C -3.07261300 -0.75532600 -1.55579900  
N -3.30700800 -0.41787700 0.63305800  
C -4.22994800 -1.44025900 -1.10988900  
H -2.67549400 -0.72067700 -2.56222000  
C -4.33569300 -1.22141100 0.24890400  
H -3.12860600 -0.10539400 1.57609200  
H -4.90499800 -2.03371300 -1.71155900  
H -5.05638900 -1.58085100 0.96982100  
B -0.10035000 2.57447000 0.49704600  
O 1.13258200 1.74154000 0.38198700  
F -0.10848100 3.18649700 1.73757600  
F -0.12060500 3.50293000 -0.54549500

Cl 0.45450300 -3.32087500 1.12735000

28

Rotation of py ring w/ anion = 120.0, Rotation of py ring w/o anion = 90.0

C 2.48018800 -0.13369100 -0.53736500  
C 3.77043100 0.27342300 -0.82929200  
C 4.59834000 -0.86608200 -0.69693100  
C 3.79068100 -1.91240500 -0.28541400  
N 2.51261500 -1.46537600 -0.19930800  
H 1.71508000 -1.98467700 0.18690000  
H 4.06349800 1.27199600 -1.12675300  
H 5.66390600 -0.91993800 -0.87675300  
H 4.03524600 -2.93640700 -0.03860400  
C 1.24532700 0.62337100 -0.37663000  
C 0.03277400 0.14895600 -0.89439400  
C -1.13088500 0.56144500 -0.27168500  
O -1.14698200 1.57299200 0.54650100  
H 0.01991000 -0.69960600 -1.56463200  
C -2.42009600 -0.13061800 -0.48666000  
C -3.47394900 0.18361600 -1.31622600  
N -2.79443300 -1.17177600 0.32057100  
C -4.51593000 -0.73952700 -1.01931200  
H -3.49416600 0.99093200 -2.03697100  
C -4.05815600 -1.56401300 -0.01452100  
H -2.13290100 -1.69684500 0.89590600  
H -5.48936800 -0.78876000 -1.48953500  
H -4.52636800 -2.40275900 0.48166500  
B 0.04330600 2.47332300 0.60524600  
O 1.28086500 1.64477900 0.41963400  
F 0.09667000 3.07336700 1.84663900  
F -0.03857500 3.40327400 -0.43170300  
Cl -0.09440600 -2.79054400 1.27063300

28

Rotation of py ring w/ anion = 120.0, Rotation of py ring w/o anion = 120.0

C -2.47032800 0.08582900 -0.44265500

C -3.74235100 -0.37210700 -0.74284400  
C -4.62694800 0.71441600 -0.55225500  
C -3.86978200 1.78066000 -0.09715200  
N -2.57242000 1.39193000 -0.02686500  
H -1.78624900 1.97509300 0.28407800  
H -3.98743900 -1.37272300 -1.07507300  
H -5.69569600 0.72082500 -0.72108400  
H -4.16199600 2.78258200 0.18634300  
C -1.21226000 -0.63674000 -0.29867500  
C -0.01034200 -0.10432600 -0.76139100  
C 1.17255800 -0.57720100 -0.20070400  
O 1.20625800 -1.69070000 0.47108500  
H -0.00667800 0.79349300 -1.36502200  
C 2.44730600 0.10752000 -0.39451400  
C 3.68378700 -0.40211300 -0.75173800  
N 2.62206000 1.40584900 0.01932000  
C 4.61898800 0.64966200 -0.60655700  
H 3.87270000 -1.41225300 -1.09145800  
C 3.92864300 1.74517600 -0.11780000  
H 1.86625600 2.01989700 0.34395400  
H 5.67761000 0.61246500 -0.82731800  
H 4.27368000 2.73604800 0.14418500  
B -0.00517300 -2.56833200 0.48903200  
O -1.22985900 -1.71239200 0.43470600  
F -0.01841900 -3.28589600 1.67029800  
F 0.02361200 -3.40049800 -0.63262400  
Cl 0.01486100 3.16820100 0.87890400

28

Rotation of py ring w/ anion = 120.0, Rotation of py ring w/o anion = 150.0

C -2.44858400 0.11000500 -0.34600100  
C -3.71857300 -0.33906300 -0.66624700  
C -4.61608300 0.71639000 -0.38087600  
C -3.86732000 1.75502700 0.14437200  
N -2.56515100 1.37469100 0.18071400  
H -1.77725900 1.97674600 0.44244200

H -3.95576300 -1.31726900 -1.06450900  
H -5.68716700 0.71998000 -0.53463500  
H -4.16686000 2.73308800 0.49558500  
C -1.19066900 -0.62535800 -0.24852800  
C 0.01206000 -0.05696000 -0.63365300  
C 1.20053400 -0.62374600 -0.15337700  
O 1.20935200 -1.81091400 0.38103900  
H 0.02331500 0.89831600 -1.14124800  
C 2.46428500 0.06201200 -0.22523600  
C 3.75555000 -0.45001800 -0.27005100  
N 2.55214100 1.43612800 -0.17923300  
C 4.63532200 0.64944300 -0.27723900  
H 4.00838000 -1.50100400 -0.32019400  
C 3.85455700 1.79550900 -0.20182200  
H 1.76468500 2.07685100 -0.01784800  
H 5.71539800 0.61997800 -0.33019500  
H 4.14128900 2.83713800 -0.14950500  
B -0.02805000 -2.64971700 0.32736500  
O -1.22634500 -1.76673600 0.38988100  
F -0.03677700 -3.49325500 1.42524400  
F -0.03816200 -3.36195600 -0.87716600  
Cl 0.02877800 3.34633400 0.55440000

28

Rotation of py ring w/ anion = 120.0, Rotation of py ring w/o anion = 180.0

C 2.44700100 -0.15289000 -0.24696000  
C 3.72826100 0.27074900 -0.55255600  
C 4.61202700 -0.76874600 -0.17513900  
C 3.84312600 -1.76858100 0.39160200  
N 2.54203000 -1.37788100 0.37258800  
H 1.74456800 -1.98161600 0.58577500  
H 3.98347800 1.22429000 -0.99677800  
H 5.68728600 -0.78560600 -0.29513900  
H 4.12519700 -2.72780500 0.80370000  
C 1.19911400 0.60946800 -0.22294700  
C -0.00291600 0.01648400 -0.55184900

|    |             |             |             |
|----|-------------|-------------|-------------|
| C  | -1.19602600 | 0.64459000  | -0.15245500 |
| O  | -1.18518700 | 1.87755700  | 0.26897700  |
| H  | -0.00918200 | -0.98842400 | -0.95198200 |
| C  | -2.44538000 | -0.04926900 | -0.05124000 |
| C  | -3.71815600 | 0.46929900  | 0.17618200  |
| N  | -2.58360400 | -1.39327000 | -0.33726700 |
| C  | -4.62925200 | -0.59309700 | 0.05523800  |
| H  | -3.93792300 | 1.50946600  | 0.37738400  |
| C  | -3.88717500 | -1.72960300 | -0.24643400 |
| H  | -1.81552100 | -2.07490600 | -0.34863400 |
| H  | -5.70397500 | -0.54852700 | 0.16854700  |
| H  | -4.20323700 | -2.75504400 | -0.38368600 |
| B  | 0.06727500  | 2.68747000  | 0.16666000  |
| O  | 1.24751000  | 1.79728400  | 0.33036200  |
| F  | 0.06828600  | 3.62763200  | 1.18410700  |
| F  | 0.11104000  | 3.29239800  | -1.09637400 |
| Cl | -0.10190100 | -3.42826700 | 0.22560600  |

28

Rotation of py ring w/ anion = 150.0, Rotation of py ring w/o anion = 0.0

|   |             |             |             |
|---|-------------|-------------|-------------|
| C | -2.45489100 | -0.17700800 | -0.09684900 |
| C | -3.65212000 | -0.88227300 | -0.14963200 |
| C | -4.69215500 | 0.04863600  | 0.03799100  |
| C | -4.09543200 | 1.28786500  | 0.22769200  |
| N | -2.75364400 | 1.14260400  | 0.15957000  |
| H | -2.08352100 | 1.92180300  | 0.21027400  |
| H | -3.74115200 | -1.94850600 | -0.31140400 |
| H | -5.75554100 | -0.15045300 | 0.03921100  |
| H | -4.53630300 | 2.25897100  | 0.40880400  |
| C | -1.10542000 | -0.68938500 | -0.10161000 |
| C | 0.00603400  | 0.11200900  | -0.34238900 |
| C | 1.27283300  | -0.41026300 | -0.08645500 |
| O | 1.44715100  | -1.67461300 | 0.20571700  |
| H | -0.11209200 | 1.16017800  | -0.59266400 |
| C | 2.45958200  | 0.40055800  | -0.06790500 |
| C | 2.63018800  | 1.77230500  | -0.22093700 |

|    |             |             |             |
|----|-------------|-------------|-------------|
| N  | 3.69496600  | -0.14887400 | 0.18850700  |
| C  | 4.00469600  | 2.03774500  | -0.06200900 |
| H  | 1.83599800  | 2.49033800  | -0.39681700 |
| C  | 4.63240200  | 0.82653400  | 0.18996600  |
| H  | 3.85672000  | -1.13342200 | 0.34324200  |
| H  | 4.49038800  | 3.00250100  | -0.11713800 |
| H  | 5.67430300  | 0.59912800  | 0.36858900  |
| B  | 0.31988100  | -2.63732900 | 0.03387000  |
| O  | -0.97474500 | -1.94671600 | 0.24836200  |
| F  | 0.45311100  | -3.64501400 | 0.97964600  |
| F  | 0.36465200  | -3.15113600 | -1.26953900 |
| Cl | -0.76417000 | 3.65915500  | 0.02654400  |

28

Rotation of py ring w/ anion = 150.0, Rotation of py ring w/o anion = 30.0

|   |             |             |             |
|---|-------------|-------------|-------------|
| C | -2.43923400 | -0.13668600 | -0.07956600 |
| C | -3.65048700 | -0.82121600 | -0.09307500 |
| C | -4.66686100 | 0.12724700  | 0.12691200  |
| C | -4.04160600 | 1.35534400  | 0.30056400  |
| N | -2.70614900 | 1.18707100  | 0.18941800  |
| H | -2.02272500 | 1.95703300  | 0.22148400  |
| H | -3.76272300 | -1.88557600 | -0.25249200 |
| H | -5.73291800 | -0.05312800 | 0.16345000  |
| H | -4.45904300 | 2.33357100  | 0.49844500  |
| C | -1.10381700 | -0.67901200 | -0.13124800 |
| C | 0.02233700  | 0.10154800  | -0.39415500 |
| C | 1.28114900  | -0.45955600 | -0.20863400 |
| O | 1.43260200  | -1.72292900 | 0.10067600  |
| H | -0.07622700 | 1.16057400  | -0.60683800 |
| C | 2.49143200  | 0.32827100  | -0.18228400 |
| C | 2.75668200  | 1.60434200  | -0.65876000 |
| N | 3.57473900  | -0.07086200 | 0.56522000  |
| C | 4.04877000  | 1.95527100  | -0.21348900 |
| H | 2.08409900  | 2.20777500  | -1.25529900 |
| C | 4.52140700  | 0.89858200  | 0.54719200  |
| H | 3.64494100  | -0.96310900 | 1.03253000  |

H 4.57596000 2.87817900 -0.41344200  
H 5.45616400 0.77390300 1.07597000  
B 0.28227100 -2.66406000 -0.00945000  
O -0.99358500 -1.93794200 0.21094800  
F 0.41491900 -3.64201300 0.96696300  
F 0.28051000 -3.22187300 -1.29447100  
Cl -0.72286100 3.67733800 0.03969500

28

Rotation of py ring w/ anion = 150.0, Rotation of py ring w/o anion = 60.0

C -2.42629800 -0.03105400 -0.11923600  
C -3.67904900 -0.63911400 -0.16618700  
C -4.63847700 0.37073000 0.01729700  
C -3.94171000 1.55980000 0.20346100  
N -2.61869100 1.31047400 0.12872100  
H -1.88956200 2.03625000 0.20406400  
H -3.85218500 -1.69500600 -0.32764100  
H -5.71426400 0.25765400 0.02000500  
H -4.30320400 2.56248100 0.38907900  
C -1.12987500 -0.65113000 -0.14303400  
C 0.05235900 0.06270000 -0.40530500  
C 1.26572700 -0.56832400 -0.21240200  
O 1.34688600 -1.82623100 0.14344000  
H 0.02047400 1.12083100 -0.63982400  
C 2.53204500 0.16578100 -0.21336100  
C 3.02215300 1.09903100 -1.10515900  
N 3.35178600 0.16496100 0.88822800  
C 4.20345300 1.64039100 -0.53678400  
H 2.57634800 1.34925000 -2.05921500  
C 4.37093600 1.04864300 0.69789000  
H 3.22463700 -0.41606400 1.70345000  
H 4.85380100 2.38431900 -0.97690300  
H 5.12959800 1.19095100 1.45464500  
B 0.15280900 -2.70852000 0.05584100  
O -1.09231900 -1.90396700 0.21379100  
F 0.20738200 -3.64225500 1.08032900

F 0.13708400 -3.32358600 -1.20064300  
Cl -0.52151000 3.68313600 0.17390500

28

Rotation of py ring w/ anion = 150.0, Rotation of py ring w/o anion = 90.0

C -2.43893500 -0.07204500 -0.19043800  
C -3.68216200 -0.70194100 -0.25616000  
C -4.66065000 0.29718800 -0.14720200  
C -3.98745100 1.50532300 0.01347300  
N -2.66099700 1.27693100 -0.00961400  
H -1.94630200 2.01594700 0.08854100  
H -3.83406200 -1.76615600 -0.38029900  
H -5.73404500 0.16757600 -0.17800300  
H -4.37138700 2.50765100 0.14986200  
C -1.13677800 -0.66603500 -0.12837200  
C 0.05161400 0.05707400 -0.38362600  
C 1.25572500 -0.52098800 -0.06233400  
O 1.35530400 -1.76514800 0.33348000  
H 0.01390500 1.09250400 -0.70181300  
C 2.53032000 0.22915000 -0.13939400  
C 3.43807900 0.32277100 -1.16962700  
N 3.02162900 0.93447000 0.92744900  
C 4.51399800 1.13040400 -0.70368300  
H 3.33495300 -0.13932400 -2.14276300  
C 4.22359900 1.49240400 0.59152100  
H 2.54383800 1.06765700 1.80597500  
H 5.39798500 1.41382700 -1.25948400  
H 4.76716300 2.10386500 1.29784100  
B 0.19101300 -2.67847300 0.19393600  
O -1.08389700 -1.89804700 0.28196600  
F 0.21049700 -3.60039600 1.22794500  
F 0.24726000 -3.30058400 -1.05718200  
Cl -0.62275000 3.67197500 0.17177800

28

Rotation of py ring w/ anion = 150.0, Rotation of py ring w/o anion = 120.0



|    |             |             |             |
|----|-------------|-------------|-------------|
| C  | -2.48539500 | 0.05486400  | -0.24319100 |
| C  | -3.78187200 | -0.44460900 | -0.29082200 |
| C  | -4.65129000 | 0.66236400  | -0.29731600 |
| C  | -3.85962100 | 1.80155800  | -0.22416100 |
| N  | -2.56084600 | 1.43092700  | -0.20450100 |
| H  | -1.76964500 | 2.06380600  | -0.03298600 |
| H  | -4.04473300 | -1.49311500 | -0.34224800 |
| H  | -5.73167000 | 0.64309200  | -0.34823500 |
| H  | -4.13716100 | 2.84557100  | -0.16991900 |
| C  | -1.22466800 | -0.63342500 | -0.17647100 |
| C  | -0.02552500 | -0.03477500 | -0.58964200 |
| C  | 1.16245900  | -0.56005500 | -0.11455600 |
| O  | 1.21554000  | -1.74627700 | 0.43302200  |
| H  | -0.03036700 | 0.93149100  | -1.07573800 |
| C  | 2.43720800  | 0.13148600  | -0.29376700 |
| C  | 3.66334500  | -0.36951600 | -0.69490600 |
| N  | 2.64000000  | 1.38998200  | 0.22236200  |
| C  | 4.61797300  | 0.65348000  | -0.48180000 |
| H  | 3.83469800  | -1.35839900 | -1.10019100 |
| C  | 3.94968800  | 1.72211600  | 0.08869600  |
| H  | 1.88825000  | 2.02227900  | 0.51337000  |
| H  | 5.67460400  | 0.61460400  | -0.71177100 |
| H  | 4.31085700  | 2.69042600  | 0.40719300  |
| B  | 0.02554700  | -2.63782400 | 0.32868900  |
| O  | -1.22462700 | -1.81686000 | 0.36758100  |
| F  | 0.01633500  | -3.50299600 | 1.41000400  |
| F  | 0.07653800  | -3.32669800 | -0.88840000 |
| Cl | -0.01491900 | 3.32673000  | 0.58237700  |

28

Rotation of py ring w/ anion = 150.0, Rotation of py ring w/o anion = 150.0

|   |             |             |             |
|---|-------------|-------------|-------------|
| C | -2.46425900 | 0.06531400  | -0.16043000 |
| C | -3.75763800 | -0.43903400 | -0.21462100 |
| C | -4.63544800 | 0.66001100  | -0.13648200 |
| C | -3.85062300 | 1.79769300  | -0.00685400 |
| N | -2.54877100 | 1.43358500  | -0.02145700 |

H -1.75785500 2.07761900 0.09403100  
H -4.01450200 -1.48506800 -0.31880800  
H -5.71654600 0.63518000 -0.16694000  
H -4.13212700 2.83610700 0.10453000  
C -1.20259500 -0.63162800 -0.12799600  
C -0.00156200 -0.01041500 -0.46449300  
C 1.19042200 -0.61507600 -0.07366600  
O 1.21765300 -1.85343100 0.34404400  
H 0.00195400 0.99567500 -0.86230100  
C 2.45799600 0.07102400 -0.13728300  
C 3.74442400 -0.44524500 -0.22422900  
N 2.55854900 1.43708900 0.01106700  
C 4.63405500 0.64595900 -0.16315800  
H 3.98888900 -1.49312900 -0.33865600  
C 3.86380700 1.79000400 -0.00797100  
H 1.77394100 2.08751600 0.13362900  
H 5.71363800 0.61127900 -0.22341000  
H 4.15764200 2.82559700 0.09757200  
B -0.00052000 -2.69742800 0.17886100  
O -1.22218300 -1.85658400 0.32969000  
F -0.00577400 -3.66910700 1.16806500  
F 0.00967400 -3.26612200 -1.10163000  
Cl 0.00287000 3.47454100 0.29259300

0

Rotation of py ring w/ anion = 150.0, Rotation of py ring w/o anion = 180.0

28

Rotation of py ring w/ anion = 180.0, Rotation of py ring w/o anion = 0.0

C -2.44835800 -0.22428600 -0.11432200  
C -3.61864600 -0.96648800 -0.24741800  
C -4.69177900 -0.05769300 -0.23603200  
C -4.14412900 1.21150400 -0.09175800  
N -2.80081100 1.10447200 -0.01822000  
H -2.16541200 1.90845900 0.07737200  
H -3.66501200 -2.04345600 -0.33965700

H -5.74532200 -0.28797800 -0.32085500  
H -4.62320700 2.17988000 -0.03643600  
C -1.09003300 -0.69161900 -0.05284600  
C 0.00737000 0.15784100 0.08443500  
C 1.28453200 -0.37860900 -0.02772400  
O 1.48642400 -1.66894400 -0.14234800  
H -0.12398500 1.23048700 0.17563500  
C 2.46756200 0.44021000 -0.07085300  
C 2.62393500 1.82099300 -0.03110300  
N 3.71884400 -0.11997800 -0.18233700  
C 4.00634500 2.08267800 -0.11786200  
H 1.82003900 2.54575800 0.04747000  
C 4.65284500 0.85938000 -0.21094700  
H 3.89263900 -1.11340800 -0.23090600  
H 4.48520700 3.05247900 -0.11547900  
H 5.70496600 0.62501700 -0.29605300  
B 0.37351300 -2.62241400 0.12628500  
O -0.93613600 -1.98882400 -0.16134600  
F 0.41630000 -2.98927800 1.47912800  
F 0.53023500 -3.73012200 -0.69819000  
Cl -0.88780600 3.66686300 0.23006200

28

Rotation of py ring w/ anion = 180.0, Rotation of py ring w/o anion = 30.0

C -2.43900700 -0.23711500 -0.02114800  
C -3.61155800 -0.98988700 -0.02720900  
C -4.68524800 -0.08609800 0.04138200  
C -4.13603300 1.19087000 0.09749200  
N -2.79168300 1.09254300 0.06231800  
H -2.15869600 1.90566300 0.07045400  
H -3.65649300 -2.06973700 -0.07688400  
H -5.74057200 -0.32329500 0.05512600  
H -4.61604200 2.15834400 0.16018000  
C -1.07845800 -0.69422100 -0.05370200  
C 0.02553800 0.16400800 -0.00455100  
C 1.29258500 -0.37255700 -0.16658400

|    |             |             |             |
|----|-------------|-------------|-------------|
| O  | 1.50236800  | -1.66497100 | -0.23339500 |
| H  | -0.10008700 | 1.23667100  | 0.09582500  |
| C  | 2.48581800  | 0.44391600  | -0.17635000 |
| C  | 2.64937400  | 1.80366400  | -0.39720400 |
| N  | 3.68795400  | -0.05629400 | 0.26616200  |
| C  | 3.99848900  | 2.11100000  | -0.11419900 |
| H  | 1.87169500  | 2.48752900  | -0.71726400 |
| C  | 4.60861700  | 0.93873800  | 0.30005700  |
| H  | 3.84716800  | -1.02279000 | 0.51059300  |
| H  | 4.47438400  | 3.07889800  | -0.19526300 |
| H  | 5.62288300  | 0.74783500  | 0.62234800  |
| B  | 0.40278900  | -2.64289300 | -0.01698200 |
| O  | -0.92467600 | -1.98997000 | -0.13444700 |
| F  | 0.53121400  | -3.18414800 | 1.26819400  |
| F  | 0.49517900  | -3.63873200 | -0.98658800 |
| Cl | -0.96187300 | 3.69253700  | 0.04710700  |

28

Rotation of py ring w/ anion = 180.0, Rotation of py ring w/o anion = 60.0

|   |             |             |             |
|---|-------------|-------------|-------------|
| C | -2.42817100 | -0.16792200 | -0.05205200 |
| C | -3.63761800 | -0.86587700 | -0.06284300 |
| C | -4.66637300 | 0.08060200  | 0.03739500  |
| C | -4.05711400 | 1.33090300  | 0.11786900  |
| N | -2.72198500 | 1.17507200  | 0.06723400  |
| H | -2.05466100 | 1.96180600  | 0.09325500  |
| H | -3.73321200 | -1.94107500 | -0.13598900 |
| H | -5.73109500 | -0.10868300 | 0.05705400  |
| H | -4.49347000 | 2.31685200  | 0.20850800  |
| C | -1.09656900 | -0.68513300 | -0.09836900 |
| C | 0.05731700  | 0.12503900  | -0.03079700 |
| C | 1.28527800  | -0.45784800 | -0.25247900 |
| O | 1.43935300  | -1.75842100 | -0.35198400 |
| H | -0.01592900 | 1.19980800  | 0.09710000  |
| C | 2.52582400  | 0.31853000  | -0.25560900 |
| C | 2.83353400  | 1.51556800  | -0.87243700 |
| N | 3.53213300  | 0.03580900  | 0.63658700  |

|    |             |             |             |
|----|-------------|-------------|-------------|
| C  | 4.09092600  | 1.93528500  | -0.36903100 |
| H  | 2.21663500  | 2.02261800  | -1.60330100 |
| C  | 4.48824300  | 1.00263200  | 0.56736100  |
| H  | 3.56372500  | -0.77836200 | 1.23214900  |
| H  | 4.63988300  | 2.82320300  | -0.65265200 |
| H  | 5.37117800  | 0.95552600  | 1.18939500  |
| B  | 0.31572200  | -2.66778500 | -0.01485600 |
| O  | -0.99137100 | -1.97962900 | -0.21329200 |
| F  | 0.42309700  | -3.03918500 | 1.33248800  |
| F  | 0.36379700  | -3.77633100 | -0.84912100 |
| Cl | -0.82648600 | 3.69790700  | 0.14469800  |

28

Rotation of py ring w/ anion = 180.0, Rotation of py ring w/o anion = 90.0

|   |             |             |             |
|---|-------------|-------------|-------------|
| C | -2.43111500 | -0.12616000 | -0.09011200 |
| C | -3.64928000 | -0.80645000 | -0.17403300 |
| C | -4.66528600 | 0.15655800  | -0.16069900 |
| C | -4.04141400 | 1.39977700  | -0.06200000 |
| N | -2.70979900 | 1.22405700  | -0.02046700 |
| H | -2.03464500 | 2.00150600  | 0.05689300  |
| H | -3.75682700 | -1.88091200 | -0.24030000 |
| H | -5.73176000 | -0.01517100 | -0.21388300 |
| H | -4.46740800 | 2.39341600  | -0.01701800 |
| C | -1.11240800 | -0.66808200 | -0.05805300 |
| C | 0.05985700  | 0.12671800  | 0.01274300  |
| C | 1.27945500  | -0.48722100 | -0.11199000 |
| O | 1.41545600  | -1.78905300 | -0.19475700 |
| H | 0.00210900  | 1.20840300  | 0.07416000  |
| C | 2.54102200  | 0.28610600  | -0.18034300 |
| C | 3.22153400  | 0.78756200  | -1.26618500 |
| N | 3.24505600  | 0.61007100  | 0.95011700  |
| C | 4.38423700  | 1.43874500  | -0.76502200 |
| H | 2.91287300  | 0.69569300  | -2.29937900 |
| C | 4.36647800  | 1.31231500  | 0.60486500  |
| H | 2.97048400  | 0.37883800  | 1.89294400  |
| H | 5.14201700  | 1.94749500  | -1.34609700 |

|    |             |             |             |
|----|-------------|-------------|-------------|
| H  | 5.05283400  | 1.66646200  | 1.36101600  |
| B  | 0.26582800  | -2.68128200 | 0.09164800  |
| O  | -1.02481000 | -1.96335000 | -0.13380200 |
| F  | 0.31993000  | -3.07495600 | 1.43415200  |
| F  | 0.31437000  | -3.77599600 | -0.75981900 |
| Cl | -0.80693900 | 3.72531500  | 0.22531400  |

28

Rotation of py ring w/ anion = 180.0, Rotation of py ring w/o anion = 120.0

|   |             |             |             |
|---|-------------|-------------|-------------|
| C | -2.43739200 | -0.13801100 | 0.05684200  |
| C | -3.65114700 | -0.81777700 | 0.16974800  |
| C | -4.67416000 | 0.13385800  | 0.05149800  |
| C | -4.05709200 | 1.36911000  | -0.13008600 |
| N | -2.72203400 | 1.19853700  | -0.13595000 |
| H | -2.04655400 | 1.97588200  | -0.18810700 |
| H | -3.75414200 | -1.88564700 | 0.30924900  |
| H | -5.74048800 | -0.04259900 | 0.09226800  |
| H | -4.48750800 | 2.35396800  | -0.25420700 |
| C | -1.11157400 | -0.67381200 | 0.04891700  |
| C | 0.04403900  | 0.10810300  | -0.15713100 |
| C | 1.27843900  | -0.47032800 | 0.04814100  |
| O | 1.42759100  | -1.75677800 | 0.24363900  |
| H | -0.02736800 | 1.17228100  | -0.35547900 |
| C | 2.52264400  | 0.29879200  | -0.04562200 |
| C | 3.67916200  | 0.01281300  | -0.74453100 |
| N | 2.77756000  | 1.37943100  | 0.76325100  |
| C | 4.63871400  | 0.99211000  | -0.38366900 |
| H | 3.80142600  | -0.80332000 | -1.44459500 |
| C | 4.05018200  | 1.81634100  | 0.55398000  |
| H | 2.10486800  | 1.81690400  | 1.37641600  |
| H | 5.64648800  | 1.08527300  | -0.76608000 |
| H | 4.43647600  | 2.67495100  | 1.08497500  |
| B | 0.27804200  | -2.67506300 | 0.03493800  |
| O | -1.01280100 | -1.95812300 | 0.24646200  |
| F | 0.36100000  | -3.71403400 | 0.95168200  |
| F | 0.30873200  | -3.15068500 | -1.28166400 |

Cl -0.74993500 3.68801900 -0.12822000

28

Rotation of py ring w/ anion = 180.0, Rotation of py ring w/o anion = 150.0

C -2.46539100 0.05372300 0.02971900

C -3.74183900 -0.48164600 0.16661400

C -4.65591800 0.58089500 0.04778800

C -3.91115900 1.73302600 -0.16874200

N -2.60006000 1.40921700 -0.19720600

H -1.83887300 2.09526800 -0.21666300

H -3.96234400 -1.52942200 0.32220300

H -5.73452500 0.52393300 0.10546200

H -4.22896600 2.75878200 -0.29876100

C -1.19534700 -0.61741700 0.00000100

C 0.00116200 0.05212800 -0.26277800

C 1.20029700 -0.59302600 -0.00167800

O 1.24529700 -1.87274400 0.27165300

H 0.00175400 1.10698300 -0.50181300

C 2.46742800 0.09771800 -0.07486300

C 3.74776400 -0.41694300 -0.22482700

N 2.58391300 1.44490600 0.19671200

C 4.64855400 0.65962700 -0.09076700

H 3.98232400 -1.45538900 -0.41833800

C 3.89187700 1.79200900 0.17110400

H 1.80754000 2.10277500 0.30655600

H 5.72658600 0.62199600 -0.17279800

H 4.19492200 2.81645300 0.33964100

B 0.03447600 -2.70905100 0.04761800

O -1.20879500 -1.90288200 0.23186800

F 0.03135800 -3.74480500 0.97211100

F 0.05665700 -3.19752800 -1.26611600

Cl -0.05979400 3.53238000 0.08049100

28

Rotation of py ring w/ anion = 180.0, Rotation of py ring w/o anion = 180.0

C -2.46924300 0.06366200 -0.08982800

C -3.74457300 -0.47404300 -0.21680300  
 C -4.65619500 0.59810400 -0.18574100  
 C -3.91083800 1.75821500 -0.02880400  
 N -2.60031600 1.43266500 0.03177800  
 H -1.83849200 2.11371000 0.09744800  
 H -3.96649200 -1.52804500 -0.31881600  
 H -5.73361200 0.54182400 -0.26316200  
 H -4.22648100 2.79065500 0.03784100  
 C -1.19830900 -0.60971100 -0.03647900  
 C 0.00104000 0.07689000 0.11672100  
 C 1.20161000 -0.60945500 -0.03014800  
 O 1.22799000 -1.90980100 -0.17507000  
 H 0.00039800 1.15189600 0.23573000  
 C 2.47097300 0.06629600 -0.08974600  
 C 3.74970200 -0.46999000 -0.18665800  
 N 2.59573700 1.43823800 -0.00646500  
 C 4.65737300 0.60583700 -0.16690500  
 H 3.97571800 -1.52574100 -0.25679900  
 C 3.90580000 1.76750900 -0.05674400  
 H 1.83179600 2.11799700 0.04300400  
 H 5.73604700 0.55175000 -0.22672400  
 H 4.21605100 2.80290100 -0.01571500  
 B 0.00280100 -2.71326700 0.08858700  
 O -1.22584900 -1.91147700 -0.16638700  
 F 0.00671300 -3.11405400 1.43209200  
 F 0.00034200 -3.81123800 -0.76350800  
 Cl -0.00597400 3.57123700 0.15225100

**The comparison between wB97x and MP2. The potential energies are calculated in gas phase and the energies includes ZPE. Units in kcal/mol.**

|       | A | TS1(A→B) | B   | TS2(B→C) | C   |
|-------|---|----------|-----|----------|-----|
| wB97x | 0 | 12.2     | 4.1 | 16.4     | 9.0 |
| MP2   | 0 | 12.2     | 4.5 | 16.6     | 9.7 |

**The detail of the initial settings for MD simulation at NVT condition**

| input | description |
|-------|-------------|
|-------|-------------|



---

|               |                                                                                                            |
|---------------|------------------------------------------------------------------------------------------------------------|
| ntx=1,        | The coordinates continue the NPT calc., but the velocity were not continued.                               |
| irest=...,    | Flag for restart MD simulation or not.                                                                     |
| nstlim=...,   | The steps of MD simulation (the actual numbers are summarized in next table).                              |
| dt=0.002,     | The time step was 2 ns.                                                                                    |
| tempi=300.0,  | The initial temperature was set to be 300 K.<br>(This simulation follows MD simulation under NPT ensemble) |
| temp0=300.0,  | The reference temperature was set to be 300 K                                                              |
| ntpr=100,     | Energy etc. were output by each 100 steps                                                                  |
| ntwx=100,     | The coordinates were output by each 100 steps                                                              |
| ntb=1,        | NVT ensemble                                                                                               |
| cut=12.0,     | The cutoff of the direct space sum of PME were 12.0 Angstroms.                                             |
| ntp=0,        | No pressure control                                                                                        |
| ntt=3,        | Langevin dynamics was employed for the temperature control.                                                |
| iwrap=1,      | The coordinates were output so that all atoms are in "primary box"                                         |
| ntwr=100,     | Restart file are output by 100 steps                                                                       |
| ntwe=100,     | energies and temperature are output by 100 steps                                                           |
| gamma_ln=2.0, | collision frequency are 2.0 ps <sup>-1</sup>                                                               |
| ntc=2,        | SHAKE algorithm was employed and the bonds including hydrogen are constrained.                             |
| ntf=2,        | The force calculation for the bond including H atoms are omitted.                                          |
| ntxo=1,       | ASCII formatted output were written                                                                        |
| ioutfm=0      | The coordinates were output in ASCII format.                                                               |

---

**The details of the steps were following:**

| section | component       | detail                                     | total      |
|---------|-----------------|--------------------------------------------|------------|
| 4.1     | TBA             | 7,500,000 * 2 +10,000,000 *3               | 45,000,000 |
| 4.2     | TEA             | 7,500,000 * 6                              | 45,000,000 |
| 4.3     | THA             | 7,500,000 * 6                              | 45,000,000 |
| 4.4     | Na <sup>+</sup> | 7,500,000 * 1+10,000,000 * 3+7,500,000 * 1 | 45,000,000 |
| 4.5     | Absent of salts | 7,500,000 * 6                              | 45,000,000 |

---

**Frcmod file for the system including boron atom**

remark goes here

MASS

B 10.810            0.000            modified by authors

BOND

cp-cd 411.70 1.434 same as ca-cd  
cp-cc 411.70 1.434 same as ca-cc  
cp-os 372.40 1.373 same as ca-os  
os-B 301.50 1.500 os-c3 modified by authors  
B -f 290.00 1.390 c3-f modified by authors

ANGLE

cp-cd-cd 67.660 111.040 same as ca-cd-cd  
cp-cd-ha 46.400 124.040 same as ca-cd-ha  
cp-na-cd 68.460 113.150 same as ca-na-cd  
cp-na-hn 47.630 125.590 same as ca-na-hn  
cp-cp-cc 64.630 124.300 same as cc-ca-cp  
cp-cp-os 71.040 121.890 same as c2-c2-os  
cd-cp-na 70.330 124.550 same as c2-c2-n3  
cd-cp-cp 64.880 120.660 same as ca-ca-ce  
na-cp-cp 72.910 108.790 same as cp-ca-na  
cp-cc-cp 63.940 117.580 same as ca-ce-ca  
cp-cc-ha 46.400 124.040 same as ca-cc-ha  
cp-os-B 63.310 119.950 c3-os-ca by kato  
cc-cp-os 71.040 121.890 same as c2-c2-os  
os-B -os 71.720 113.730 os-c3-os  
os-B -f 70.660 110.610 f -c3-os  
f -B -f 71.260 107.160 f -c3-f

DIHE

cp-cp-cc-cp 1 6.650 180.000 2.000 same as X -c2-  
c2-X  
cp-cp-cc-ha 1 6.650 180.000 2.000 same as X -c2-  
c2-X  
cp-cp-os-B 1 0.900 180.000 2.000 same as X -ca-os-X  
  
cd-cp-na-cd 1 0.300 180.000 2.000 same as X -ca-  
na-X

|                     |   |       |         |       |                    |
|---------------------|---|-------|---------|-------|--------------------|
| cd-cp-na-hn         | 1 | 0.300 | 180.000 | 2.000 | same as X -ca-na-X |
| cd-cd-cp-na<br>c2-X | 1 | 6.650 | 180.000 | 2.000 | same as X -c2-     |
| cd-cd-cp-cp<br>c2-X | 1 | 6.650 | 180.000 | 2.000 | same as X -c2-     |
| cd-na-cp-cp<br>na-X | 1 | 0.300 | 180.000 | 2.000 | same as X -ca-     |
| na-cp-cd-ha<br>c2-X | 1 | 6.650 | 180.000 | 2.000 | same as X -c2-     |
| hn-na-cp-cp<br>na-X | 1 | 0.300 | 180.000 | 2.000 | same as X -ca-     |
| ha-cd-cp-cp<br>c2-X | 1 | 6.650 | 180.000 | 2.000 | same as X -c2-     |
| cp-cc-cp-os<br>c2-X | 1 | 6.650 | 180.000 | 2.000 | same as X -c2-     |
| cp-os-B -os         | 3 | 1.150 | 0.000   | 3.000 | X-c3-os-X          |
| cp-os-B -f          | 3 | 1.150 | 0.000   | 3.000 | X-c3-os-X          |
| cc-cp-os-B<br>os-X  | 1 | 0.900 | 180.000 | 2.000 | same as X -ca-     |
| os-cp-cc-ha<br>c2-X | 1 | 6.650 | 180.000 | 2.000 | same as X -c2-     |

#### IMPROPER

|                                        |     |       |     |                     |
|----------------------------------------|-----|-------|-----|---------------------|
| cd-cp-cp-na                            | 1.1 | 180.0 | 2.0 | Using default value |
| cd-cp-cd-ha                            | 1.1 | 180.0 | 2.0 | Using default value |
| cd-cd-cd-ha                            | 1.1 | 180.0 | 2.0 | Using default value |
| cd-ha-cd-na                            | 1.1 | 180.0 | 2.0 | Using default value |
| cd-cp-na-hn                            | 1.1 | 180.0 | 2.0 | General improper    |
| torsional angle (2 general atom types) |     |       |     |                     |
| cc-cp-cp-os                            | 1.1 | 180.0 | 2.0 | Using default value |
| cp-cp-cc-ha                            | 1.1 | 180.0 | 2.0 | Using default value |

#### NONBON

|   |       |       |                     |
|---|-------|-------|---------------------|
| B | 2.010 | 0.095 | ATTN, need revision |
|---|-------|-------|---------------------|

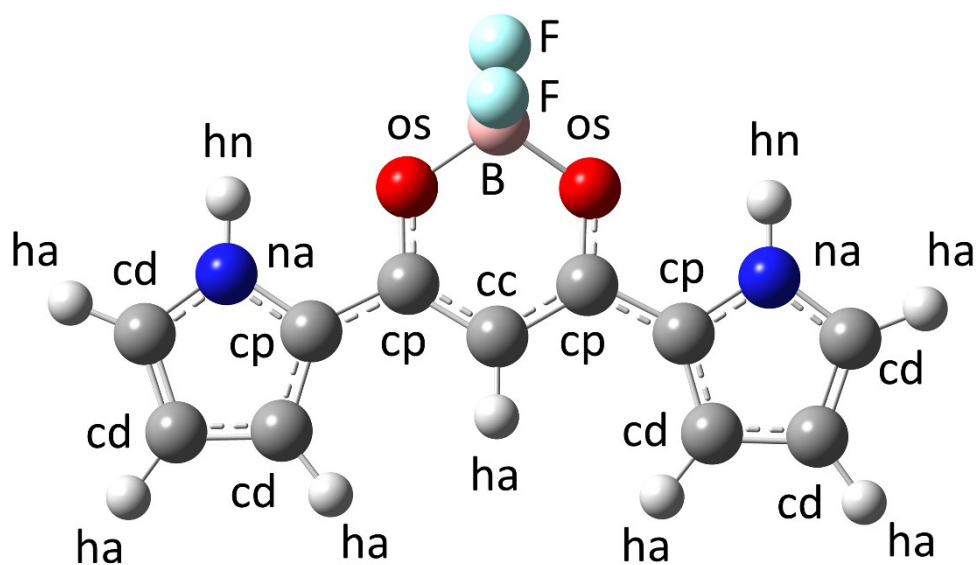

Fig. S6 The atomtype corresponding to the frmod file above.

The comparison of optimized structure between DFT and MM

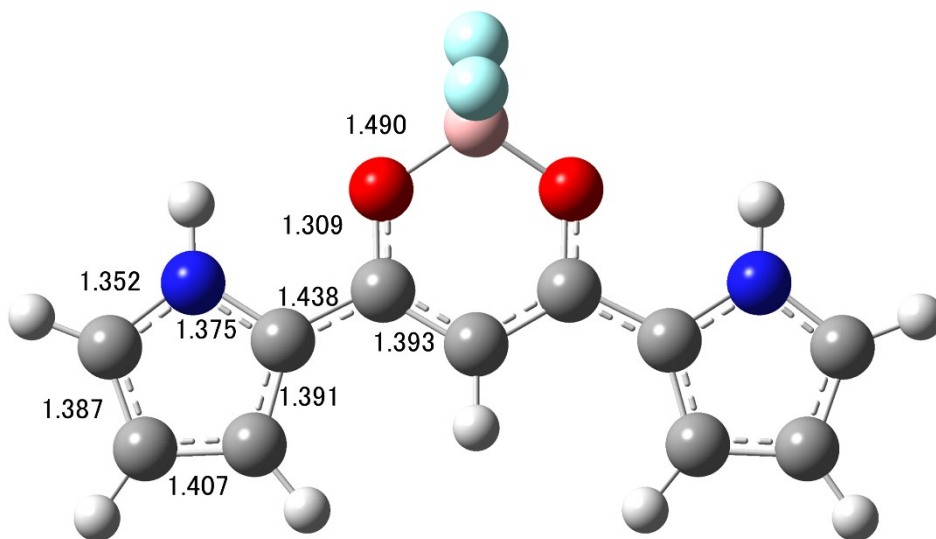

Fig. S7 The structure **A** of **1** optimized with DFT method.

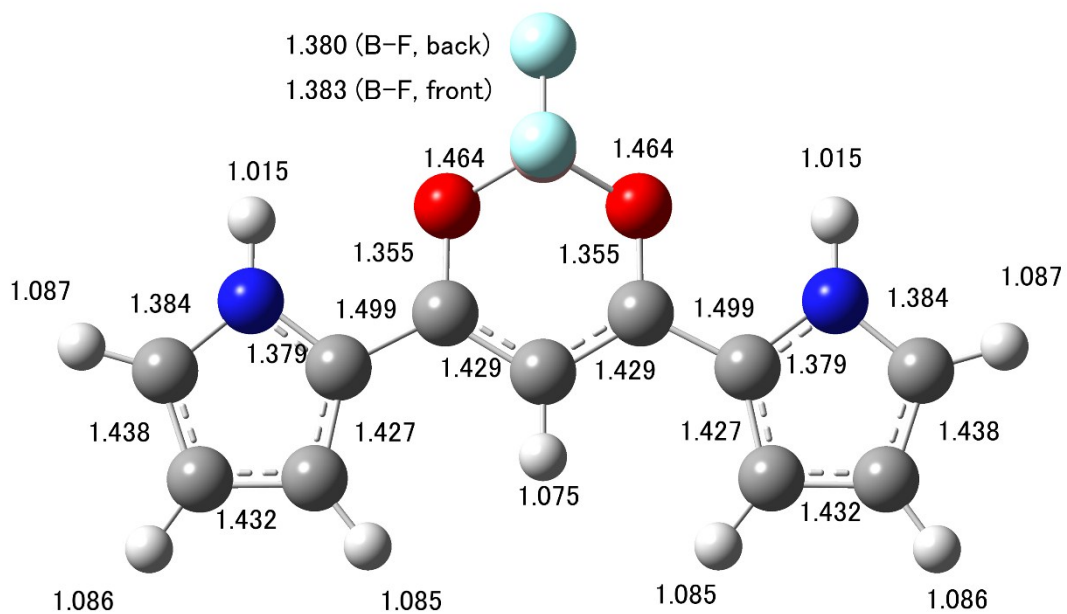

Fig. S8 The structure **A** of **1** optimized with MM method.

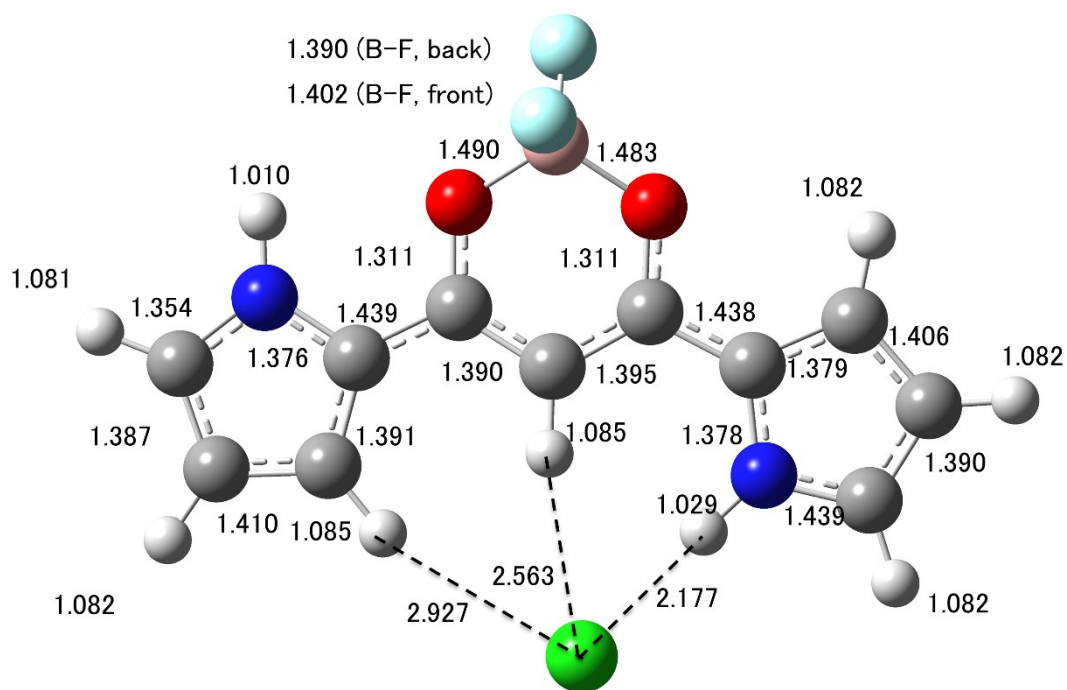

Fig. S9 The structure **B-I** of **1-Cl<sup>-</sup>** optimized with DFT method.

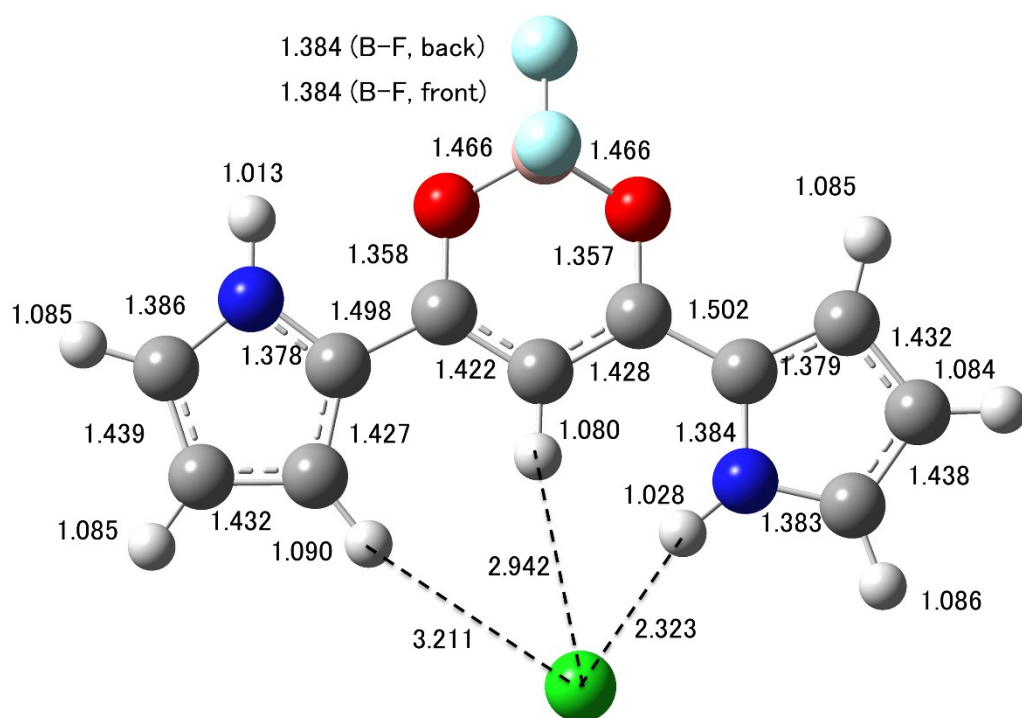

Fig. S10 The structure **B-I** of **1-Cl<sup>-</sup>** optimized with MM method.

### The Single-crystal X-ray structures<sup>1</sup>

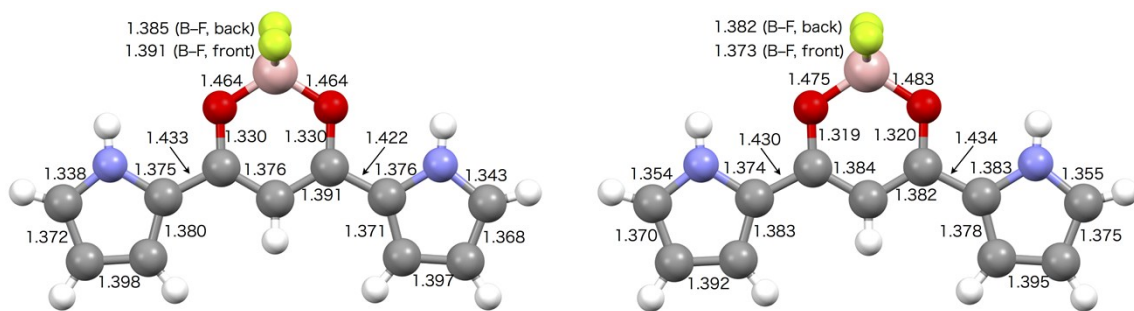

Fig. S11 The structure **A** of **1** (two independent structures).

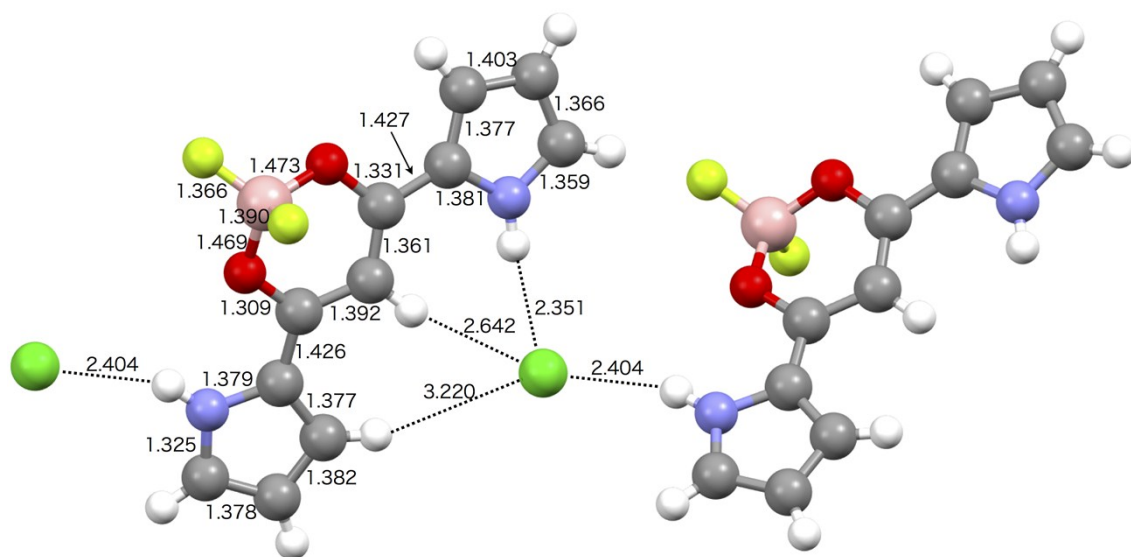

Fig. S12 The structure **B-I** of **1-Cl**.

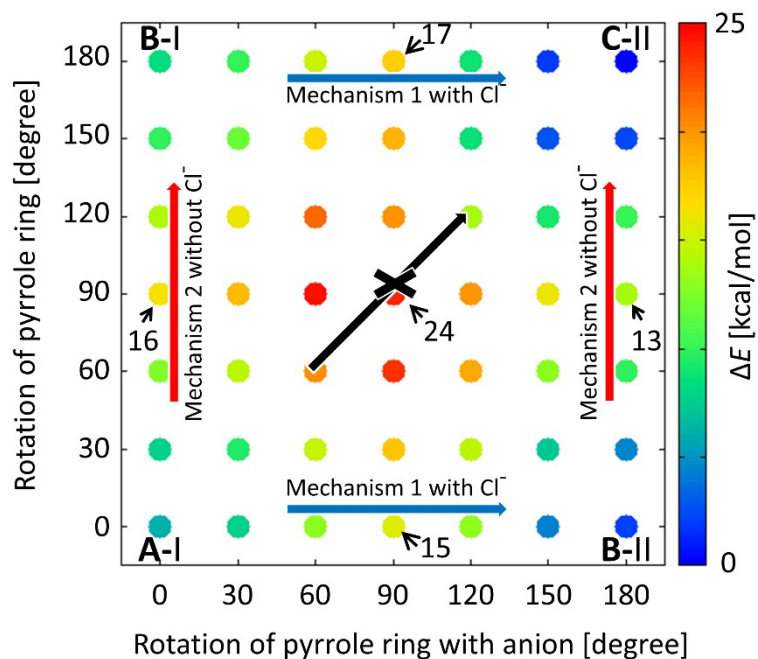

Fig. S13 Scatter plot version of PES of **1** corresponding to the actually computed structures without interpolations. The potential energies were calculated for each 30 degrees for each direction. The blue and red arrows show the mechanism 1 with  $\text{Cl}^-$  and mechanism 2 without  $\text{Cl}^-$ , respectively. The numbers in the graph are corresponding to the potential energies at  $(0^\circ, 90^\circ)$ ,  $(90^\circ, 0^\circ)$ ,  $(180^\circ, 90^\circ)$ ,  $(90^\circ, 180^\circ)$ , and  $(90^\circ, 90^\circ)$ . The diagonal black arrow shows the concerted pyrrole ring rotation from the Structure A-I to C-II.

## References

1. H. Maeda and Y. Kusunose, *Chem. Eur. J.*, 2005, **11**, 5661-5666.
